# Supplementary material for: Dynamic changes of fecal microbiota in a weight-change model of Bama minipigs
Source: Front Microbiol. 2023 Oct 20;14:1239847. doi: 10.3389/fmicb.2023.1239847 (PMC10623433; doi:10.3389/fmicb.2023.1239847)
Supplement: Supplementary file 5 [file Table_5.XLSX]

## Sheet: A. KO_diversity_sig.
Table S5-A1. Significance test of alpha diversity of predicted KEGG genes (compare between Gain and Lose period)
	Group 1	Group 2	Group1 mean	Group2 mean	H	p-value
Shannon (KO)	gain (n=378)	lose (n=40)	10.559	10.942	77.633	< 0.01
Observed_KO	gain (n=378)	lose (n=40)	5126	5384	26.679	< 0.01
#Kruskal-Wallis H test
Table S5-A2. The influence of different factors on the alpha diversity of KEGG gene
	Time_period	factor	H	p-value
Shannon (KO)	gain (n-378)	week	69.127	< 0.01
Shannon (KO)	gain (n-378)	host	49.891	0.113
Observed_KO	gain (n-378)	week	65.979	< 0.01
Observed_KO	gain (n-378)	host	30.309	0.839
Shannon (KO)	lose (n=40)	week	9.829	0.02
Shannon (KO)	lose (n=40)	host	8.015	0.532
Observed_KO	lose (n=40)	week	13.788	< 0.01
Observed_KO	lose (n=40)	host	4.018	0.91
#Kruskal-Wallis H test
Table S5-A3. Significance test of beta diversity of KEGG genes
Comparison type	Method	factor	Sample size	No. of Groups	Permutations	jaccard	jaccard	bray_curtis	bray_curtis
						R / pseudo-F	p-value	R / pseudo-F	p-value
All	PERMANOVA	time_period (gain vs. lose)	418	2	999	70.9871	< 0.01	114.911	< 0.01
Gain	PERMANOVA	week	378	11	999	7.65225	< 0.01	4.66005	< 0.01
Lose	PERMANOVA	week	40	4	999	4.1064	< 0.01	4.97145	< 0.01

## Sheet: B. KEGG_sig._KOs
	Table S5-B. KEGG genes co-related with body weight
Time period	KEGG_id	KO name	Av. Counts	Spearman
				R	p
Lose	K02945	RP-S1, rpsA; small subunit ribosomal protein S1	32723.4	0.354315	<0.01
Lose	K13714	atl; bifunctional autolysin [EC:3.5.1.28 3.2.1.96]	26.4123	0.346623	0.01
Lose	K07003	K07003; uncharacterized protein	13476.5	0.371576	0.01
Lose	K00831	serC, PSAT1; phosphoserine aminotransferase [EC:2.6.1.52]	26577.3	0.318949	0.02
Lose	K07473	dinJ; DNA-damage-inducible protein J	5188.92	0.27955	0.04
Lose	K00086	dhaT; 1,3-propanediol dehydrogenase [EC:1.1.1.202]	10.1727	0.321107	0.04
Gain	K03483	mtlR; mannitol operon transcriptional antiterminator	647.908	-0.499355	<0.01
Gain	K00105	E1.1.3.21; alpha-glycerophosphate oxidase [EC:1.1.3.21]	324.339	-0.483532	<0.01
Gain	K01274	E3.4.13.-; D-alanyl-D-alanine dipeptidase [EC:3.4.13.-]	320.951	-0.483141	<0.01
Gain	K01598	PPCDC, coaC; phosphopantothenoylcysteine decarboxylase [EC:4.1.1.36]	347.998	-0.480846	<0.01
Gain	K03493	bglG1; transcriptional antiterminator	321.686	-0.480761	<0.01
Gain	K12554	murN; alanine adding enzyme [EC:2.3.2.-]	324.517	-0.478351	<0.01
Gain	K19137	csn2; CRISPR-associated protein Csn2	321.528	-0.47792	<0.01
Gain	K18216	steA, tetA46; ATP-binding cassette, subfamily B, tetracycline resistant protein	320.969	-0.477638	<0.01
Gain	K12999	rgpI; glucosyltransferase [EC:2.4.1.-]	321.561	-0.477285	<0.01
Gain	K02531	lacT; transcriptional antiterminator	325.239	-0.475803	<0.01
Gain	K12556	pbp2X; penicillin-binding protein 2X	324.411	-0.474746	<0.01
Gain	K11705	mtsC; iron/zinc/manganese/copper transport system permease protein	345.038	-0.472903	<0.01
Gain	K01819	E5.3.1.26, lacA, lacB; galactose-6-phosphate isomerase [EC:5.3.1.26]	662.399	-0.471998	<0.01
Gain	K18217	steB, tetB46; ATP-binding cassette, subfamily B, tetracycline resistant protein	321.814	-0.471543	<0.01
Gain	K12296	comX1_2; competence protein ComX	323.537	-0.471097	<0.01
Gain	K11706	mtsB; iron/zinc/manganese/copper transport system ATP-binding protein	344.991	-0.470856	<0.01
Gain	K05363	murM; serine/alanine adding enzyme [EC:2.3.2.10]	413.284	-0.470601	<0.01
Gain	K18474	fabM; trans-2-decenoyl-[acyl-carrier protein] isomerase [EC:5.3.3.14]	324.069	-0.470127	<0.01
Gain	K02788	PTS-Lac-EIIC, lacE; PTS system, lactose-specific IIC component	344.348	-0.469359	<0.01
Gain	K01361	E3.4.21.96; lactocepin [EC:3.4.21.96]	351.219	-0.468285	<0.01
Gain	K00687	pbp2B, penA; penicillin-binding protein 2B	331.281	-0.468261	<0.01
Gain	K07272	rgpF; rhamnosyltransferase [EC:2.4.1.-]	322.884	-0.466416	<0.01
Gain	K05362	murE; UDP-N-acetylmuramoyl-L-alanyl-D-glutamate-L-lysine ligase [EC:6.3.2.7]	326.301	-0.464387	<0.01
Gain	K14983	ciaR; two-component system, OmpR family, response regulator CiaR	333.106	-0.46252	<0.01
Gain	K14982	ciaH; two-component system, OmpR family, sensor histidine kinase CiaH [EC:2.7.13.3]	333.106	-0.461952	<0.01
Gain	K12997	rgpB; rhamnosyltransferase [EC:2.4.1.-]	326.019	-0.460904	<0.01
Gain	K11704	mtsA; iron/zinc/manganese/copper transport system substrate-binding protein	332.417	-0.460631	<0.01
Gain	K07778	desK; two-component system, NarL family, sensor histidine kinase DesK [EC:2.7.13.3]	350.008	-0.459633	<0.01
Gain	K02530	lacR; DeoR family transcriptional regulator, lactose phosphotransferase system repressor	337.589	-0.458514	<0.01
Gain	K03342	pabBC; para-aminobenzoate synthetase / 4-amino-4-deoxychorismate lyase [EC:2.6.1.85 4.1.3.38]	367.996	-0.453379	<0.01
Gain	K11617	liaS; two-component system, NarL family, sensor histidine kinase LiaS [EC:2.7.13.3]	336.47	-0.452186	<0.01
Gain	K03930	estA; putative tributyrin esterase [EC:3.1.1.-]	329.002	-0.45062	<0.01
Gain	K03713	glnR; MerR family transcriptional regulator, glutamine synthetase repressor	351.744	-0.448607	<0.01
Gain	K09962	K09962; uncharacterized protein	345.407	-0.448038	<0.01
Gain	K12996	rgpA; rhamnosyltransferase [EC:2.4.1.-]	328.75	-0.444312	<0.01
Gain	K11618	liaR; two-component system, NarL family, response regulator LiaR	424.655	-0.438317	<0.01
Gain	K00917	lacC; tagatose 6-phosphate kinase [EC:2.7.1.144]	490.145	-0.436537	<0.01
Gain	K02786	PTS-Lac-EIIA, lacF; PTS system, lactose-specific IIA component [EC:2.7.1.207]	514.535	-0.43383	<0.01
Gain	K08986	ycgQ; putative membrane protein	396.091	-0.431324	<0.01
Gain	K01261	pepA; glutamyl aminopeptidase [EC:3.4.11.7]	544.648	-0.419724	<0.01
Gain	K13714	atl; bifunctional autolysin [EC:3.5.1.28 3.2.1.96]	149.038	-0.38657	<0.01
Gain	K11754	folC; dihydrofolate synthase / folylpolyglutamate synthase [EC:6.3.2.12 6.3.2.17]	49580.4	-0.38522	<0.01
Gain	K05823	dapL; N-acetyldiaminopimelate deacetylase [EC:3.5.1.47]	735.269	-0.381963	<0.01
Gain	K18104	abcA, bmrA; ATP-binding cassette, subfamily B, bacterial AbcA/BmrA [EC:3.6.3.44]	155.046	-0.367109	<0.01
Gain	K05910	npr; NADH peroxidase [EC:1.11.1.1]	155.036	-0.364035	<0.01
Gain	K01465	URA4, pyrC; dihydroorotase [EC:3.5.2.3]	44997.7	-0.363131	<0.01
Gain	K13677	dgs, bgsA; 1,2-diacylglycerol-3-alpha-glucose alpha-1,2-glucosyltransferase [EC:2.4.1.208]	1360.19	-0.358988	<0.01
Gain	K04086	clpL; ATP-dependent Clp protease ATP-binding subunit ClpL	505.886	-0.35848	<0.01
Gain	K06207	typA, bipA; GTP-binding protein	42903.8	-0.344953	<0.01
Gain	K02503	HINT1, hinT, hit; histidine triad (HIT) family protein	42573.8	-0.341825	<0.01
Gain	K09952	csn1, cas9; CRISPR-associated endonuclease Csn1 [EC:3.1.-.-]	981.683	-0.341196	<0.01
Gain	K13789	GGPS; geranylgeranyl diphosphate synthase, type II [EC:2.5.1.1 2.5.1.10 2.5.1.29]	41979.8	-0.340624	<0.01
Gain	K03217	yidC, spoIIIJ, OXA1, ccfA; YidC/Oxa1 family membrane protein insertase	44867.9	-0.339328	<0.01
Gain	K02337	dnaE; DNA polymerase III subunit alpha [EC:2.7.7.7]	45788.4	-0.336778	<0.01
Gain	K00134	GAPDH, gapA; glyceraldehyde 3-phosphate dehydrogenase [EC:1.2.1.12]	47623.1	-0.335425	<0.01
Gain	K00760	hprT, hpt, HPRT1; hypoxanthine phosphoribosyltransferase [EC:2.4.2.8]	44251.5	-0.334877	<0.01
Gain	K03978	engB; GTP-binding protein	42755.8	-0.33483	<0.01
Gain	K03075	secG; preprotein translocase subunit SecG	43285.1	-0.334679	<0.01
Gain	K07447	ruvX; putative holliday junction resolvase [EC:3.1.-.-]	42708.7	-0.334442	<0.01
Gain	K00783	rlmH; 23S rRNA (pseudouridine1915-N3)-methyltransferase [EC:2.1.1.177]	42545.3	-0.332362	<0.01
Gain	K02519	infB, MTIF2; translation initiation factor IF-2	43567.1	-0.332054	<0.01
Gain	K02913	RP-L33, MRPL33, rpmG; large subunit ribosomal protein L33	44656.1	-0.329181	<0.01
Gain	K03466	ftsK, spoIIIE; DNA segregation ATPase FtsK/SpoIIIE, S-DNA-T family	45451.1	-0.328813	<0.01
Gain	K11991	tadA; tRNA(adenine34) deaminase [EC:3.5.4.33]	42406.3	-0.328479	<0.01
Gain	K03665	hflX; GTPase	43247.1	-0.32845	<0.01
Gain	K03550	ruvA; holliday junction DNA helicase RuvA [EC:3.6.4.12]	43524.8	-0.327579	<0.01
Gain	K02687	prmA; ribosomal protein L11 methyltransferase [EC:2.1.1.-]	42120.3	-0.326964	<0.01
Gain	K02914	RP-L34, MRPL34, rpmH; large subunit ribosomal protein L34	43144.2	-0.324566	<0.01
Gain	K07456	mutS2; DNA mismatch repair protein MutS2	42676.6	-0.324192	<0.01
Gain	K03650	mnmE, trmE, MSS1; tRNA modification GTPase [EC:3.6.-.-]	43456.7	-0.324119	<0.01
Gain	K09748	rimP; ribosome maturation factor RimP	43458.6	-0.322743	<0.01
Gain	K03977	engA, der; GTPase	43507.4	-0.322693	<0.01
Gain	K07560	dtd, DTD1; D-tyrosyl-tRNA(Tyr) deacylase [EC:3.1.-.-]	42830.6	-0.322053	<0.01
Gain	K00554	trmD; tRNA (guanine37-N1)-methyltransferase [EC:2.1.1.228]	43523.6	-0.321196	<0.01
Gain	K02316	dnaG; DNA primase [EC:2.7.7.-]	43609.3	-0.32118	<0.01
Gain	K03040	rpoA; DNA-directed RNA polymerase subunit alpha [EC:2.7.7.6]	43420.3	-0.320361	<0.01
Gain	K03596	lepA; GTP-binding protein LepA	43529.8	-0.320228	<0.01
Gain	K18682	rny; ribonucrease Y [EC:3.1.-.-]	42787.8	-0.319619	<0.01
Gain	K02926	RP-L4, MRPL4, rplD; large subunit ribosomal protein L4	43527.2	-0.318745	<0.01
Gain	K02970	RP-S21, MRPS21, rpsU; small subunit ribosomal protein S21	43313.1	-0.318696	<0.01
Gain	K00954	E2.7.7.3A, coaD, kdtB; pantetheine-phosphate adenylyltransferase [EC:2.7.7.3]	43531.9	-0.318347	<0.01
Gain	K02313	dnaA; chromosomal replication initiator protein	43708.9	-0.318107	<0.01
Gain	K02963	RP-S18, MRPS18, rpsR; small subunit ribosomal protein S18	43529.6	-0.317315	<0.01
Gain	K03536	rnpA; ribonuclease P protein component [EC:3.1.26.5]	43433.8	-0.316995	<0.01
Gain	K03501	gidB, rsmG; 16S rRNA (guanine527-N7)-methyltransferase [EC:2.1.1.170]	43512.3	-0.316965	<0.01
Gain	K03437	spoU; RNA methyltransferase, TrmH family	43009.7	-0.315878	<0.01
Gain	K03570	mreC; rod shape-determining protein MreC	43453.3	-0.315633	<0.01
Gain	K04078	groES, HSPE1; chaperonin GroES	43546.7	-0.31546	<0.01
Gain	K06925	tsaE; tRNA threonylcarbamoyladenosine biosynthesis protein TsaE	43497.3	-0.31541	<0.01
Gain	K03625	nusB; N utilization substance protein B	43514	-0.315083	<0.01
Gain	K02887	RP-L20, MRPL20, rplT; large subunit ribosomal protein L20	43527.2	-0.314839	<0.01
Gain	K03043	rpoB; DNA-directed RNA polymerase subunit beta [EC:2.7.7.6]	43553	-0.314469	<0.01
Gain	K00075	murB; UDP-N-acetylmuramate dehydrogenase [EC:1.3.1.98]	43539.6	-0.314351	<0.01
Gain	K09710	ybeB; ribosome-associated protein	43039.5	-0.314331	<0.01
Gain	K03495	gidA, mnmG, MTO1; tRNA uridine 5-carboxymethylaminomethyl modification enzyme	43526.8	-0.314065	<0.01
Gain	K02916	RP-L35, MRPL35, rpmI; large subunit ribosomal protein L35	43507.3	-0.313974	<0.01
Gain	K03177	truB, PUS4, TRUB1; tRNA pseudouridine55 synthase [EC:5.4.99.25]	43526.5	-0.313425	<0.01
Gain	K02838	frr, MRRF, RRF; ribosome recycling factor	43507.3	-0.313205	<0.01
Gain	K04567	KARS, lysS; lysyl-tRNA synthetase, class II [EC:6.1.1.6]	42996.3	-0.313154	<0.01
Gain	K02959	RP-S16, MRPS16, rpsP; small subunit ribosomal protein S16	43525.3	-0.313128	<0.01
Gain	K03629	recF; DNA replication and repair protein RecF	43116.6	-0.313004	<0.01
Gain	K00604	MTFMT, fmt; methionyl-tRNA formyltransferase [EC:2.1.2.9]	43571.4	-0.31298	<0.01
Gain	K02939	RP-L9, MRPL9, rplI; large subunit ribosomal protein L9	43520.2	-0.312858	<0.01
Gain	K03584	recO; DNA repair protein RecO (recombination protein O)	43467.1	-0.312728	<0.01
Gain	K02518	infA; translation initiation factor IF-1	43549.1	-0.312286	<0.01
Gain	K01972	E6.5.1.2, ligA, ligB; DNA ligase (NAD+) [EC:6.5.1.2]	44016	-0.311943	<0.01
Gain	K03631	recN; DNA repair protein RecN (Recombination protein N)	43524.7	-0.311798	<0.01
Gain	K01056	PTH1, pth, spoVC; peptidyl-tRNA hydrolase, PTH1 family [EC:3.1.1.29]	43552.7	-0.311407	<0.01
Gain	K04485	radA, sms; DNA repair protein RadA/Sms	42912.7	-0.311373	<0.01
Gain	K02836	prfB; peptide chain release factor 2	43527.2	-0.311324	<0.01
Gain	K02860	rimM; 16S rRNA processing protein RimM	43449.7	-0.311264	<0.01
Gain	K04066	priA; primosomal protein N' (replication factor Y) (superfamily II helicase) [EC:3.6.4.-]	43528.7	-0.311093	<0.01
Gain	K03551	ruvB; holliday junction DNA helicase RuvB [EC:3.6.4.12]	43527.2	-0.310751	<0.01
Gain	K03046	rpoC; DNA-directed RNA polymerase subunit beta' [EC:2.7.7.6]	43562.8	-0.310182	<0.01
Gain	K04075	tilS, mesJ; tRNA(Ile)-lysidine synthase [EC:6.3.4.19]	43514.4	-0.310092	<0.01
Gain	K01679	E4.2.1.2B, fumC, FH; fumarate hydratase, class II [EC:4.2.1.2]	6139.35	-0.309537	<0.01
Gain	K02902	RP-L28, MRPL28, rpmB; large subunit ribosomal protein L28	43408.4	-0.309357	<0.01
Gain	K02834	rbfA; ribosome-binding factor A	43282.1	-0.309353	<0.01
Gain	K02884	RP-L19, MRPL19, rplS; large subunit ribosomal protein L19	43527.2	-0.309349	<0.01
Gain	K03734	apbE; FAD:protein FMN transferase [EC:2.7.1.180]	43882.5	-0.309128	<0.01
Gain	K02954	RP-S14, MRPS14, rpsN; small subunit ribosomal protein S14	44671	-0.30893	<0.01
Gain	K02888	RP-L21, MRPL21, rplU; large subunit ribosomal protein L21	43521.8	-0.308893	<0.01
Gain	K02935	RP-L7, MRPL12, rplL; large subunit ribosomal protein L7/L12	43526.2	-0.308127	<0.01
Gain	K11749	rseP; regulator of sigma E protease [EC:3.4.24.-]	43511.5	-0.308077	<0.01
Gain	K04077	groEL, HSPD1; chaperonin GroEL	43570.3	-0.307866	<0.01
Gain	K03696	clpC; ATP-dependent Clp protease ATP-binding subunit ClpC	42006.7	-0.307346	<0.01
Gain	K07462	recJ; single-stranded-DNA-specific exonuclease [EC:3.1.-.-]	43626.2	-0.307254	<0.01
Gain	K00806	uppS; undecaprenyl diphosphate synthase [EC:2.5.1.31]	43958.3	-0.306975	<0.01
Gain	K02520	infC, MTIF3; translation initiation factor IF-3	43526.4	-0.306552	<0.01
Gain	K02911	RP-L32, MRPL32, rpmF; large subunit ribosomal protein L32	43526.3	-0.30655	<0.01
Gain	K03979	obgE, cgtA; GTPase [EC:3.6.5.-]	43527.2	-0.306515	<0.01
Gain	K03664	smpB; SsrA-binding protein	43527.2	-0.305297	<0.01
Gain	K02879	RP-L17, MRPL17, rplQ; large subunit ribosomal protein L17	43527.4	-0.305136	<0.01
Gain	K06881	nrnA; bifunctional oligoribonuclease and PAP phosphatase NrnA [EC:3.1.3.7 3.1.13.3]	42853.6	-0.304535	<0.01
Gain	K03723	mfd; transcription-repair coupling factor (superfamily II helicase) [EC:3.6.4.-]	43626.2	-0.304264	<0.01
Gain	K02340	holA; DNA polymerase III subunit delta [EC:2.7.7.7]	43494.8	-0.303909	<0.01
Gain	K02835	prfA, MTRF1, MRF1; peptide chain release factor 1	43527.3	-0.303844	<0.01
Gain	K01934	MTHFS; 5-formyltetrahydrofolate cyclo-ligase [EC:6.3.3.2]	43009.8	-0.303581	<0.01
Gain	K01810	GPI, pgi; glucose-6-phosphate isomerase [EC:5.3.1.9]	43264.8	-0.303562	<0.01
Gain	K00054	mvaA; hydroxymethylglutaryl-CoA reductase [EC:1.1.1.88]	2987.22	-0.303458	<0.01
Gain	K04096	smf; DNA processing protein	43534.7	-0.303323	<0.01
Gain	K03073	secE; preprotein translocase subunit SecE	42942.9	-0.30331	<0.01
Gain	K06187	recR; recombination protein RecR	43527	-0.30282	<0.01
Gain	K02357	tsf, TSFM; elongation factor Ts	43527.2	-0.302534	<0.01
Gain	K03565	recX; regulatory protein	42146.7	-0.301734	<0.01
Gain	K01635	lacD; tagatose 1,6-diphosphate aldolase [EC:4.1.2.40]	1297.69	-0.30137	<0.01
Gain	K01491	folD; methylenetetrahydrofolate dehydrogenase (NADP+) / methenyltetrahydrofolate cyclohydrolase [EC:1.5.1.5 3.5.4.9]	43568.6	-0.301082	<0.01
Gain	K02899	RP-L27, MRPL27, rpmA; large subunit ribosomal protein L27	43527.2	-0.300977	<0.01
Gain	K03471	rnhC; ribonuclease HIII [EC:3.1.26.4]	1215.25	-0.300207	<0.01
Gain	K07390	grxD, GLRX5; monothiol glutaredoxin	474.519	0.30001	<0.01
Gain	K01141	sbcB, exoI; exodeoxyribonuclease I [EC:3.1.11.1]	386.04	0.300038	<0.01
Gain	K06194	nlpD; lipoprotein NlpD	593.415	0.300498	<0.01
Gain	K04082	hscB, HSCB, HSC20; molecular chaperone HscB	450.744	0.300804	<0.01
Gain	K02055	ABC.SP.S; putative spermidine/putrescine transport system substrate-binding protein	1275.07	0.301236	<0.01
Gain	K05873	E4.6.1.1B, cyaB; adenylate cyclase, class 2 [EC:4.6.1.1]	1537.12	0.301299	<0.01
Gain	K07289	asmA; AsmA protein	769.492	0.302021	<0.01
Gain	K09128	K09128; uncharacterized protein	459.677	0.302209	<0.01
Gain	K06186	bamE, smpA; outer membrane protein assembly factor BamE	489.093	0.302433	<0.01
Gain	K11014	cdtB; cytolethal distending toxin subunit B	282.098	0.302596	<0.01
Gain	K02570	napD; periplasmic nitrate reductase NapD	395.829	0.302623	<0.01
Gain	K11015	cdtC; cytolethal distending toxin subunit C	280.482	0.302725	<0.01
Gain	K09780	K09780; uncharacterized protein	428.16	0.302947	<0.01
Gain	K03611	dsbB; disulfide bond formation protein DsbB	864.812	0.303014	<0.01
Gain	K11076	potG; putrescine transport system ATP-binding protein	463.74	0.303047	<0.01
Gain	K02053	ABC.SP.P; putative spermidine/putrescine transport system permease protein	1227.05	0.303058	<0.01
Gain	K00381	cysI; sulfite reductase (NADPH) hemoprotein beta-component [EC:1.8.1.2]	453.251	0.303337	<0.01
Gain	K14347	SLC10A7, P7; solute carrier family 10 (sodium/bile acid cotransporter), member 7	458.477	0.30352	<0.01
Gain	K13896	yejF; microcin C transport system ATP-binding protein	396.722	0.30395	<0.01
Gain	K03635	MOCS2B, moaE; molybdopterin synthase catalytic subunit [EC:2.8.1.12]	814.911	0.304221	<0.01
Gain	K05805	creA; CreA protein	414.961	0.305142	<0.01
Gain	K09927	K09927; uncharacterized protein	931.093	0.305261	<0.01
Gain	K08994	yneE, BEST; ion channel-forming bestrophin family protein	426.075	0.305414	<0.01
Gain	K00123	fdoG, fdhF, fdwA; formate dehydrogenase major subunit [EC:1.17.1.9]	4410.95	0.305501	<0.01
Gain	K09123	lhpI; cis-L-3-hydroxyproline dehydratase [EC:4.2.1.171]	465.128	0.305512	<0.01
Gain	K07122	mlaB; phospholipid transport system transporter-binding protein	460.525	0.305883	<0.01
Gain	K05845	opuC; osmoprotectant transport system substrate-binding protein	3596.32	0.305909	<0.01
Gain	K09924	K09924; uncharacterized protein	325.594	0.30603	<0.01
Gain	K16066	ydfG; 3-hydroxy acid dehydrogenase / malonic semialdehyde reductase [EC:1.1.1.381 1.1.1.-]	415.296	0.30635	<0.01
Gain	K11534	deoR; DeoR family transcriptional regulator, deoxyribose operon repressor	337.033	0.306394	<0.01
Gain	K11041	eta; exfoliative toxin A/B	967.291	0.306439	<0.01
Gain	K15539	rodZ; cytoskeleton protein RodZ	590.391	0.306865	<0.01
Gain	K11075	potH; putrescine transport system permease protein	444.879	0.307131	<0.01
Gain	K07497	K07497; putative transposase	3975.79	0.307693	<0.01
Gain	K11074	potI; putrescine transport system permease protein	444.889	0.307753	<0.01
Gain	K16137	nemR; TetR/AcrR family transcriptional regulator, transcriptional repressor for nem operon	492.173	0.307789	<0.01
Gain	K11743	mdtJ; spermidine export protein MdtJ	520.96	0.307811	<0.01
Gain	K07673	narX; two-component system, NarL family, nitrate/nitrite sensor histidine kinase NarX [EC:2.7.13.3]	383.819	0.308069	<0.01
Gain	K10125	dctB; two-component system, NtrC family, C4-dicarboxylate transport sensor histidine kinase DctB [EC:2.7.13.3]	355.915	0.308614	<0.01
Gain	K19784	chrR, NQR; chromate reductase, NAD(P)H dehydrogenase (quinone)	627.092	0.308707	<0.01
Gain	K01093	appA; 4-phytase / acid phosphatase [EC:3.1.3.26 3.1.3.2]	519.972	0.309174	<0.01
Gain	K19333	kdgR; IclR family transcriptional regulator, KDG regulon repressor	378.424	0.309222	<0.01
Gain	K05879	dhaL; phosphoenolpyruvate---glycerone phosphotransferase subunit DhaL [EC:2.7.1.121]	3074.71	0.3093	<0.01
Gain	K17247	msrQ; methionine sulfoxide reductase heme-binding subunit	400.837	0.309405	<0.01
Gain	K00116	mqo; malate dehydrogenase (quinone) [EC:1.1.5.4]	338.799	0.309428	<0.01
Gain	K07722	nikR; CopG family transcriptional regulator, nickel-responsive regulator	1022.44	0.310351	<0.01
Gain	K07459	ybjD; putative ATP-dependent endonuclease of the OLD family	509.421	0.310379	<0.01
Gain	K03828	yjgM; putative acetyltransferase [EC:2.3.1.-]	640.978	0.310495	<0.01
Gain	K11742	mdtI; spermidine export protein MdtI	520.96	0.310677	<0.01
Gain	K07223	K07223; putative iron-dependent peroxidase	543.544	0.310915	<0.01
Gain	K07121	K07121; uncharacterized protein	628.88	0.311276	<0.01
Gain	K06879	queF; 7-cyano-7-deazaguanine reductase [EC:1.7.1.13]	478.412	0.31152	<0.01
Gain	K02444	glpR; DeoR family transcriptional regulator, glycerol-3-phosphate regulon repressor	1167.83	0.311757	<0.01
Gain	K13283	fieF; ferrous-iron efflux pump FieF	444.466	0.311831	<0.01
Gain	K09921	K09921; uncharacterized protein	383.161	0.311848	<0.01
Gain	K00813	aspC; aspartate aminotransferase [EC:2.6.1.1]	497.112	0.312484	<0.01
Gain	K07665	cusR, copR, silR; two-component system, OmpR family, copper resistance phosphate regulon response regulator CusR	375.869	0.312639	<0.01
Gain	K03079	ulaE, sgaU, sgbU; L-ribulose-5-phosphate 3-epimerase [EC:5.1.3.22]	496.16	0.312829	<0.01
Gain	K07250	gabT; 4-aminobutyrate aminotransferase / (S)-3-amino-2-methylpropionate transaminase [EC:2.6.1.19 2.6.1.22]	354.224	0.313076	<0.01
Gain	K01708	garD; galactarate dehydratase [EC:4.2.1.42]	338.52	0.313133	<0.01
Gain	K13954	yiaY; alcohol dehydrogenase [EC:1.1.1.1]	1913.13	0.313413	<0.01
Gain	K03813	modD; molybdenum transport protein [EC:2.4.2.-]	348.856	0.314114	<0.01
Gain	K11179	tusE, dsrC; tRNA 2-thiouridine synthesizing protein E [EC:2.8.1.-]	648.14	0.31425	<0.01
Gain	K10778	ada; AraC family transcriptional regulator, regulatory protein of adaptative response / methylated-DNA-[protein]-cysteine methyltransferase [EC:2.1.1.63]	470.092	0.314353	<0.01
Gain	K13641	iclR; IclR family transcriptional regulator, acetate operon repressor	339.683	0.314368	<0.01
Gain	K01706	gudD; glucarate dehydratase [EC:4.2.1.40]	357.925	0.315456	<0.01
Gain	K03830	yafP; putative acetyltransferase [EC:2.3.1.-]	1222.28	0.315508	<0.01
Gain	K02549	menC; O-succinylbenzoate synthase [EC:4.2.1.113]	534.931	0.316099	<0.01
Gain	K09806	K09806; uncharacterized protein	360.721	0.31612	<0.01
Gain	K10679	nfnB, nfsB; nitroreductase / dihydropteridine reductase [EC:1.-.-.- 1.5.1.34]	371.205	0.316132	<0.01
Gain	K01816	hyi, gip; hydroxypyruvate isomerase [EC:5.3.1.22]	981.956	0.316319	<0.01
Gain	K07709	zraS, hydH; two-component system, NtrC family, sensor histidine kinase HydH [EC:2.7.13.3]	708.913	0.316905	<0.01
Gain	K06039	ychN; uncharacterized protein involved in oxidation of intracellular sulfur	441.973	0.316923	<0.01
Gain	K05878	dhaK; phosphoenolpyruvate---glycerone phosphotransferase subunit DhaK [EC:2.7.1.121]	3293.97	0.316963	<0.01
Gain	K07343	tfoX; DNA transformation protein and related proteins	1637.53	0.316986	<0.01
Gain	K04044	hscA; molecular chaperone HscA	437.513	0.317162	<0.01
Gain	K13771	nsrR; Rrf2 family transcriptional regulator, nitric oxide-sensitive transcriptional repressor	823.442	0.317656	<0.01
Gain	K05591	dbpA; ATP-independent RNA helicase DbpA [EC:3.6.4.13]	440.638	0.317702	<0.01
Gain	K07287	bamC; outer membrane protein assembly factor BamC	380.479	0.317928	<0.01
Gain	K03756	potE; putrescine:ornithine antiporter	335.066	0.318249	<0.01
Gain	K01483	allA; ureidoglycolate lyase [EC:4.3.2.3]	344.71	0.318593	<0.01
Gain	K07262	pbpG; serine-type D-Ala-D-Ala endopeptidase (penicillin-binding protein 7) [EC:3.4.21.-]	408.981	0.319132	<0.01
Gain	K10213	rihB; ribosylpyrimidine nucleosidase [EC:3.2.2.8]	291.813	0.319263	<0.01
Gain	K11904	vgrG; type VI secretion system secreted protein VgrG	432.022	0.319425	<0.01
Gain	K05541	dusC; tRNA-dihydrouridine synthase C [EC:1.-.-.-]	446.198	0.319824	<0.01
Gain	K09160	K09160; uncharacterized protein	412.928	0.319904	<0.01
Gain	K03656	rep; ATP-dependent DNA helicase Rep [EC:3.6.4.12]	453.316	0.319923	<0.01
Gain	K07789	mdtC; multidrug efflux pump	529.711	0.319973	<0.01
Gain	K06077	slyB; outer membrane lipoprotein SlyB	375.773	0.320216	<0.01
Gain	K02048	cysP, sbp; sulfate transport system substrate-binding protein	1010.6	0.320289	<0.01
Gain	K03299	TC.GNTP; gluconate:H+ symporter, GntP family	6650.06	0.320621	<0.01
Gain	K02552	menF; menaquinone-specific isochorismate synthase [EC:5.4.4.2]	499.761	0.320845	<0.01
Gain	K10539	araG; L-arabinose transport system ATP-binding protein [EC:3.6.3.17]	679.821	0.32093	<0.01
Gain	K01048	pldB; lysophospholipase [EC:3.1.1.5]	1584.28	0.321824	<0.01
Gain	K09696	natB; sodium transport system permease protein	645.92	0.322073	<0.01
Gain	K06202	cyaY; CyaY protein	397.393	0.322173	<0.01
Gain	K02498	hemY; HemY protein	388.663	0.322346	<0.01
Gain	K02686	priB; primosomal replication protein N	366.181	0.322779	<0.01
Gain	K04844	ycjT; hypothetical glycosyl hydrolase [EC:3.2.1.-]	1204.19	0.322953	<0.01
Gain	K19337	hexR; RpiR family transcriptional regulator, carbohydrate utilization regulator	427.871	0.323129	<0.01
Gain	K07788	mdtB; multidrug efflux pump	530.557	0.323532	<0.01
Gain	K03554	rdgC; recombination associated protein RdgC	427.953	0.323545	<0.01
Gain	K01139	spoT; GTP diphosphokinase / guanosine-3',5'-bis(diphosphate) 3'-diphosphatase [EC:2.7.6.5 3.1.7.2]	555.996	0.324143	<0.01
Gain	K03599	sspA, mglA; stringent starvation protein A	417.128	0.324369	<0.01
Gain	K15256	cmoA; tRNA (cmo5U34)-methyltransferase [EC:2.1.1.-]	502.669	0.324513	<0.01
Gain	K09691	ABC-2.LPSE.A; lipopolysaccharide transport system ATP-binding protein	1147.02	0.324824	<0.01
Gain	K09684	pucR; purine catabolism regulatory protein	274.411	0.325047	<0.01
Gain	K01664	pabA; para-aminobenzoate synthetase component II [EC:2.6.1.85]	918.499	0.32515	<0.01
Gain	K12528	xdhD; putative selenate reductase molybdopterin-binding subunit	292.329	0.325341	<0.01
Gain	K00163	aceE; pyruvate dehydrogenase E1 component [EC:1.2.4.1]	431.011	0.325537	<0.01
Gain	K02858	ribB, RIB3; 3,4-dihydroxy 2-butanone 4-phosphate synthase [EC:4.1.99.12]	1017.01	0.325545	<0.01
Gain	K03749	dedD; DedD protein	340.123	0.325675	<0.01
Gain	K00697	otsA; trehalose 6-phosphate synthase [EC:2.4.1.15 2.4.1.347]	408.099	0.325682	<0.01
Gain	K00108	betA, CHDH; choline dehydrogenase [EC:1.1.99.1]	394.803	0.325785	<0.01
Gain	K03446	emrB; MFS transporter, DHA2 family, multidrug resistance protein	934.525	0.325791	<0.01
Gain	K07232	CHAC, chaC; glutathione-specific gamma-glutamylcyclotransferase [EC:4.3.2.7]	353.449	0.325928	<0.01
Gain	K12529	ygfM; putative selenate reductase FAD-binding subunit	292.026	0.326012	<0.01
Gain	K02566	nagD; NagD protein	1593.78	0.326313	<0.01
Gain	K05501	slmA, ttk; TetR/AcrR family transcriptional regulator	370.642	0.326534	<0.01
Gain	K16326	yeiL; CRP/FNR family transcriptional regulator, putaive post-exponential-phase nitrogen-starvation regulator	287.263	0.326838	<0.01
Gain	K03557	fis; Fis family transcriptional regulator, factor for inversion stimulation protein	456.603	0.326863	<0.01
Gain	K03577	acrR, smeT; TetR/AcrR family transcriptional regulator, acrAB operon repressor	417.851	0.32694	<0.01
Gain	K01716	fabA; 3-hydroxyacyl-[acyl-carrier protein] dehydratase / trans-2-decenoyl-[acyl-carrier protein] isomerase [EC:4.2.1.59 5.3.3.14]	438.857	0.327081	<0.01
Gain	K08092	dlgD; 3-dehydro-L-gulonate 2-dehydrogenase [EC:1.1.1.130]	689.362	0.327274	<0.01
Gain	K09972	aapP, bztD; general L-amino acid transport system ATP-binding protein [EC:3.6.3.-]	366.771	0.327445	<0.01
Gain	K07113	fxsA; UPF0716 protein FxsA	399.681	0.328104	<0.01
Gain	K03567	gcvR; glycine cleavage system transcriptional repressor	550.946	0.32821	<0.01
Gain	K10544	xylH; D-xylose transport system permease protein	313.888	0.328454	<0.01
Gain	K07039	K07039; uncharacterized protein	376.576	0.328714	<0.01
Gain	K09913	ppnP; purine/pyrimidine-nucleoside phosphorylase [EC:2.4.2.1 2.4.2.2]	400.605	0.329374	<0.01
Gain	K10126	dctD; two-component system, NtrC family, C4-dicarboxylate transport response regulator DctD	339.937	0.329445	<0.01
Gain	K00060	tdh; threonine 3-dehydrogenase [EC:1.1.1.103]	973.806	0.329547	<0.01
Gain	K18778	zapD; cell division protein ZapD	371.459	0.3299	<0.01
Gain	K02081	agaR; DeoR family transcriptional regulator, aga operon transcriptional repressor	390.447	0.330123	<0.01
Gain	K07467	rstA1; phage replication initiation protein	514.861	0.330431	<0.01
Gain	K07455	recT; recombination protein RecT	136.609	0.330469	<0.01
Gain	K03548	perM; putative permease	415.365	0.330492	<0.01
Gain	K10011	arnA, pmrI; UDP-4-amino-4-deoxy-L-arabinose formyltransferase / UDP-glucuronic acid dehydrogenase (UDP-4-keto-hexauronic acid decarboxylating) [EC:2.1.2.13 1.1.1.305]	1021.92	0.330982	<0.01
Gain	K02568	napB; cytochrome c-type protein NapB	348.533	0.331651	<0.01
Gain	K06048	gshA, ybdK; glutamate---cysteine ligase / carboxylate-amine ligase [EC:6.3.2.2 6.3.-.-]	363.887	0.33181	<0.01
Gain	K00230	hemG; menaquinone-dependent protoporphyrinogen oxidase [EC:1.3.5.3]	460.112	0.332038	<0.01
Gain	K10680	nemA; N-ethylmaleimide reductase [EC:1.-.-.-]	384.049	0.332416	<0.01
Gain	K03753	mobB; molybdopterin-guanine dinucleotide biosynthesis adapter protein	1284.04	0.332736	<0.01
Gain	K02791	PTS-MalGlc-EIIC, malX; PTS system, maltose/glucose-specific IIC component	2486.62	0.333013	<0.01
Gain	K08173	ydfJ; MFS transporter, MHS family, metabolite:H+ symporter	462.197	0.333459	<0.01
Gain	K01087	otsB; trehalose 6-phosphate phosphatase [EC:3.1.3.12]	388.533	0.333633	<0.01
Gain	K09823	zur; Fur family transcriptional regulator, zinc uptake regulator	408.664	0.333775	<0.01
Gain	K03417	prpB; methylisocitrate lyase [EC:4.1.3.30]	355.539	0.334007	<0.01
Gain	K12111	ebgA; evolved beta-galactosidase subunit alpha [EC:3.2.1.23]	747.939	0.334103	<0.01
Gain	K01066	aes; acetyl esterase [EC:3.1.1.-]	433.867	0.334824	<0.01
Gain	K10111	malK, mtlK, thuK; multiple sugar transport system ATP-binding protein [EC:3.6.3.-]	442.555	0.335416	<0.01
Gain	K01069	gloB, HAGH; hydroxyacylglutathione hydrolase [EC:3.1.2.6]	553.341	0.335532	<0.01
Gain	K01974	RTCA, rtcA; RNA 3'-terminal phosphate cyclase (ATP) [EC:6.5.1.4]	307.262	0.335537	<0.01
Gain	K08159	sotB; MFS transporter, DHA1 family, L-arabinose/isopropyl-beta-D-thiogalactopyranoside export protein	375.341	0.335604	<0.01
Gain	K07400	nfuA; Fe/S biogenesis protein NfuA	483.611	0.335657	<0.01
Gain	K01042	selA; L-seryl-tRNA(Ser) seleniumtransferase [EC:2.9.1.1]	1572.46	0.336146	<0.01
Gain	K09801	K09801; uncharacterized protein	414.737	0.336208	<0.01
Gain	K05685	macB; macrolide transport system ATP-binding/permease protein [EC:3.6.3.-]	431.863	0.336388	<0.01
Gain	K11103	dctA; aerobic C4-dicarboxylate transport protein	389.527	0.336426	<0.01
Gain	K05834	rhtB; homoserine/homoserine lactone efflux protein	362.915	0.336594	<0.01
Gain	K10545	xylG; D-xylose transport system ATP-binding protein [EC:3.6.3.17]	326.093	0.336654	<0.01
Gain	K15552	tauC; taurine transport system permease protein	1112.75	0.336684	<0.01
Gain	K11392	rsmF; 16S rRNA (cytosine1407-C5)-methyltransferase [EC:2.1.1.178]	506.351	0.33753	<0.01
Gain	K06938	K06938; uncharacterized protein	382.49	0.337695	<0.01
Gain	K06176	truD, PUS7; tRNA pseudouridine13 synthase [EC:5.4.99.27]	627.902	0.337805	<0.01
Gain	K03119	tauD; taurine dioxygenase [EC:1.14.11.17]	353.329	0.337896	<0.01
Gain	K04045	hscC; molecular chaperone HscC	475.217	0.338158	<0.01
Gain	K14187	tyrA; chorismate mutase / prephenate dehydrogenase [EC:5.4.99.5 1.3.1.12]	428.1	0.33853	<0.01
Gain	K15268	eamA; O-acetylserine/cysteine efflux transporter	390.515	0.339217	<0.01
Gain	K07308	dmsC; anaerobic dimethyl sulfoxide reductase subunit C (DMSO reductase anchor subunit)	491.837	0.339431	<0.01
Gain	K15554	ssuC; sulfonate transport system permease protein	1482.25	0.339881	<0.01
Gain	K07300	chaA, CAX; Ca2+:H+ antiporter	644.316	0.340035	<0.01
Gain	K02783	PTS-Gut-EIIC, srlA; PTS system, glucitol/sorbitol-specific IIC component	315.719	0.340512	<0.01
Gain	K07666	qseB; two-component system, OmpR family, response regulator QseB	382.963	0.340797	<0.01
Gain	K08169	yebQ; MFS transporter, DHA2 family, multidrug resistance protein	367.534	0.340872	<0.01
Gain	K06075	slyA; MarR family transcriptional regulator, transcriptional regulator for hemolysin	491.736	0.341027	<0.01
Gain	K01690	edd; phosphogluconate dehydratase [EC:4.2.1.12]	341.873	0.341359	<0.01
Gain	K08680	menH; 2-succinyl-6-hydroxy-2,4-cyclohexadiene-1-carboxylate synthase [EC:4.2.99.20]	435.436	0.34138	<0.01
Gain	K07783	uhpC; MFS transporter, OPA family, sugar phosphate sensor protein UhpC	314.929	0.341561	<0.01
Gain	K03594	bfr; bacterioferritin [EC:1.16.3.1]	4430.18	0.341567	<0.01
Gain	K07644	cusS, copS, silS; two-component system, OmpR family, heavy metal sensor histidine kinase CusS [EC:2.7.13.3]	347.333	0.341955	<0.01
Gain	K04081	ibpB; molecular chaperone IbpB	302.195	0.342148	<0.01
Gain	K02196	ccmD; heme exporter protein D	393.835	0.342162	<0.01
Gain	K07048	PTER, php; phosphotriesterase-related protein	1109.71	0.34228	<0.01
Gain	K05816	ugpC; sn-glycerol 3-phosphate transport system ATP-binding protein [EC:3.6.3.20]	371.366	0.342306	<0.01
Gain	K01638	aceB, glcB; malate synthase [EC:2.3.3.9]	765.942	0.342648	<0.01
Gain	K16090	fiu; catecholate siderophore receptor	336.611	0.342973	<0.01
Gain	K05365	mrcB; penicillin-binding protein 1B [EC:2.4.1.129 3.4.16.4]	461.471	0.343058	<0.01
Gain	K00363	nirD; nitrite reductase (NADH) small subunit [EC:1.7.1.15]	398.249	0.343297	<0.01
Gain	K03818	wcaF; putative colanic acid biosynthesis acetyltransferase WcaF [EC:2.3.1.-]	297.941	0.3438	<0.01
Gain	K04018	nrfG; formate-dependent nitrite reductase complex subunit NrfG	308.395	0.34401	<0.01
Gain	K02083	allC; allantoate deiminase [EC:3.5.3.9]	451.672	0.344308	<0.01
Gain	K00247	frdD; fumarate reductase subunit D	412.185	0.344721	<0.01
Gain	K03586	ftsL; cell division protein FtsL	390.919	0.344767	<0.01
Gain	K07642	baeS, smeS; two-component system, OmpR family, sensor histidine kinase BaeS [EC:2.7.13.3]	305.139	0.344819	<0.01
Gain	K05787	hupA; DNA-binding protein HU-alpha	400.134	0.344944	<0.01
Gain	K06219	smtA; S-adenosylmethionine-dependent methyltransferase	419.535	0.344967	<0.01
Gain	K08306	mltC; membrane-bound lytic murein transglycosylase C [EC:4.2.2.-]	517.22	0.345182	<0.01
Gain	K02494	lolB; outer membrane lipoprotein LolB	383.932	0.345299	<0.01
Gain	K05812	yfiP; DTW domain-containing protein	317.11	0.34535	<0.01
Gain	K08984	yjdF; putative membrane protein	322.775	0.34552	<0.01
Gain	K07740	rsd; regulator of sigma D	392.473	0.345705	<0.01
Gain	K10108	malE; maltose/maltodextrin transport system substrate-binding protein	385.592	0.345711	<0.01
Gain	K09892	zapB; cell division protein ZapB	533.244	0.345934	<0.01
Gain	K09017	rutR; TetR/AcrR family transcriptional regulator	359.124	0.346022	<0.01
Gain	K03683	rnt; ribonuclease T [EC:3.1.13.-]	432.758	0.346145	<0.01
Gain	K11750	frsA; esterase FrsA [EC:3.1.-.-]	383.878	0.346236	<0.01
Gain	K07803	zraP; zinc resistance-associated protein	497.926	0.346251	<0.01
Gain	K12056	traG; conjugal transfer mating pair stabilization protein TraG	304.14	0.346405	<0.01
Gain	K03087	rpoS; RNA polymerase nonessential primary-like sigma factor	329.377	0.346475	<0.01
Gain	K00219	fadH; 2,4-dienoyl-CoA reductase (NADPH2) [EC:1.3.1.34]	693.427	0.346597	<0.01
Gain	K09891	K09891; uncharacterized protein	388.47	0.346719	<0.01
Gain	K06957	tmcA; tRNA(Met) cytidine acetyltransferase [EC:2.3.1.193]	387.749	0.346858	<0.01
Gain	K00076	hdhA; 7-alpha-hydroxysteroid dehydrogenase [EC:1.1.1.159]	1200.22	0.347137	<0.01
Gain	K06212	focA; formate transporter	389.595	0.347326	<0.01
Gain	K00694	bcsA; cellulose synthase (UDP-forming) [EC:2.4.1.12]	366.048	0.347711	<0.01
Gain	K07261	mepA; penicillin-insensitive murein DD-endopeptidase [EC:3.4.24.-]	402.409	0.347771	<0.01
Gain	K03835	mtr; tryptophan-specific transport protein	520.121	0.348068	<0.01
Gain	K03619	hyaE; hydrogenase-1 operon protein HyaE	332.372	0.348238	<0.01
Gain	K01637	E4.1.3.1, aceA; isocitrate lyase [EC:4.1.3.1]	382.921	0.348395	<0.01
Gain	K12152	nudJ; phosphatase NudJ [EC:3.6.1.-]	383.863	0.348541	<0.01
Gain	K09897	K09897; uncharacterized protein	388.18	0.348993	<0.01
Gain	K00906	aceK; isocitrate dehydrogenase kinase/phosphatase [EC:2.7.11.5 3.1.3.-]	316.589	0.349279	<0.01
Gain	K00068	srlD; sorbitol-6-phosphate 2-dehydrogenase [EC:1.1.1.140]	600.819	0.349286	<0.01
Gain	K02682	ppdD; prepilin peptidase dependent protein D	382.673	0.349458	<0.01
Gain	K10004	gltL, aatP; glutamate/aspartate transport system ATP-binding protein [EC:3.6.3.-]	359.995	0.349465	<0.01
Gain	K04770	lonH; Lon-like ATP-dependent protease [EC:3.4.21.-]	388.108	0.349568	<0.01
Gain	K19227	sapB; cationic peptide transport system permease protein	388.196	0.349612	<0.01
Gain	K02402	flhC; flagellar transcriptional activator FlhC	299.684	0.349738	<0.01
Gain	K09902	K09902; uncharacterized protein	427.943	0.349882	<0.01
Gain	K10109	malF; maltose/maltodextrin transport system permease protein	385.592	0.350211	<0.01
Gain	K07751	pepB; PepB aminopeptidase [EC:3.4.11.23]	392.684	0.350217	<0.01
Gain	K03297	emrE, qac, mmr, smr; small multidrug resistance pump	428.819	0.350235	<0.01
Gain	K15984	rsmJ; 16S rRNA (guanine1516-N2)-methyltransferase [EC:2.1.1.242]	447.909	0.350359	<0.01
Gain	K02431	fucU, FUOM; L-fucose mutarotase [EC:5.1.3.29]	1061.53	0.350661	<0.01
Gain	K19230	sapF; cationic peptide transport system ATP-binding protein	388.196	0.350782	<0.01
Gain	K03776	aer; aerotaxis receptor	357.175	0.350914	<0.01
Gain	K19235	ybiS; L,D-transpeptidase YbiS	385.063	0.350987	<0.01
Gain	K07109	K07109; uncharacterized protein	293.93	0.351056	<0.01
Gain	K09899	K09899; uncharacterized protein	388.196	0.351204	<0.01
Gain	K09019	rutE; 3-hydroxypropanoate dehydrogenase [EC:1.1.1.-]	322.463	0.351291	<0.01
Gain	K07153	hflD; high frequency lysogenization protein	402.995	0.351386	<0.01
Gain	K04691	hhoB, degS; serine protease DegS [EC:3.4.21.-]	425.421	0.351439	<0.01
Gain	K07479	yrdD; putative DNA topoisomerase	388.196	0.351462	<0.01
Gain	K03598	rseB; sigma-E factor negative regulatory protein RseB	330.944	0.35147	<0.01
Gain	K05851	cyaA; adenylate cyclase, class 1 [EC:4.6.1.1]	398.241	0.351543	<0.01
Gain	K02521	ilvY; LysR family transcriptional regulator, positive regulator for ilvC	398.334	0.351936	<0.01
Gain	K07140	K07140; uncharacterized protein	368.23	0.352084	<0.01
Gain	K03314	nhaB; Na+:H+ antiporter, NhaB family	387.9	0.352157	<0.01
Gain	K07648	arcB; two-component system, OmpR family, aerobic respiration control sensor histidine kinase ArcB [EC:2.7.13.3]	388.108	0.352251	<0.01
Gain	K05803	nlpI; lipoprotein NlpI	388.561	0.352336	<0.01
Gain	K00362	nirB; nitrite reductase (NADH) large subunit [EC:1.7.1.15]	383.019	0.352633	<0.01
Gain	K09136	ycaO; ribosomal protein S12 methylthiotransferase accessory factor	896.728	0.352667	<0.01
Gain	K05590	srmB; ATP-dependent RNA helicase SrmB [EC:3.6.4.13]	388.196	0.352699	<0.01
Gain	K03573	mutH; DNA mismatch repair protein MutH	388.196	0.352768	<0.01
Gain	K01138	K01138; uncharacterized sulfatase [EC:3.1.6.-]	1872.87	0.352967	<0.01
Gain	K02403	flhD; flagellar transcriptional activator FlhD	299.774	0.353019	<0.01
Gain	K02560	lpxM, msbB; lauroyl-Kdo2-lipid IVA myristoyltransferase [EC:2.3.1.243]	391.701	0.35308	<0.01
Gain	K16710	wcaK, amsJ; colanic acid/amylovoran biosynthesis protein	301.369	0.353242	<0.01
Gain	K08224	ynfM; MFS transporter, YNFM family, putative membrane transport protein	312.361	0.353277	<0.01
Gain	K06140	rnk; regulator of nucleoside diphosphate kinase	336.525	0.353284	<0.01
Gain	K02569	napC; cytochrome c-type protein NapC	351.636	0.353349	<0.01
Gain	K00389	yidH; putative membrane protein	476.74	0.353361	<0.01
Gain	K08312	nudE; ADP-ribose diphosphatase [EC:3.6.1.-]	401.416	0.353386	<0.01
Gain	K01584	adiA; arginine decarboxylase [EC:4.1.1.19]	318.326	0.353559	<0.01
Gain	K00998	pssA; CDP-diacylglycerol---serine O-phosphatidyltransferase [EC:2.7.8.8]	388.28	0.353663	<0.01
Gain	K04062	osmB; osmotically inducible lipoprotein OsmB	306.346	0.353726	<0.01
Gain	K01792	E5.1.3.15; glucose-6-phosphate 1-epimerase [EC:5.1.3.15]	366.305	0.353743	<0.01
Gain	K10001	gltI, aatJ; glutamate/aspartate transport system substrate-binding protein	362.149	0.353868	<0.01
Gain	K18997	cbpM; chaperone modulatory protein CbpM	541.366	0.354017	<0.01
Gain	K00042	garR, glxR; 2-hydroxy-3-oxopropionate reductase [EC:1.1.1.60]	2094.89	0.354154	<0.01
Gain	K14055	uspE; universal stress protein E	389.287	0.354677	<0.01
Gain	K04080	ibpA; molecular chaperone IbpA	380.584	0.354688	<0.01
Gain	K07773	arcA; two-component system, OmpR family, aerobic respiration control protein ArcA	388.196	0.354731	<0.01
Gain	K19229	sapD; cationic peptide transport system ATP-binding protein	388.196	0.354883	<0.01
Gain	K04774	sohB; serine protease SohB [EC:3.4.21.-]	429.675	0.354909	<0.01
Gain	K02849	waaQ, rfaQ; heptosyltransferase III [EC:2.4.-.-]	344.36	0.354933	<0.01
Gain	K18471	ydjG; methylglyoxal reductase [EC:1.1.1.-]	308.871	0.355165	<0.01
Gain	K03717	nhaR; LysR family transcriptional regulator, transcriptional activator of nhaA	311.987	0.355247	<0.01
Gain	K05874	tsr; methyl-accepting chemotaxis protein I, serine sensor receptor	310.161	0.355448	<0.01
Gain	K03746	hns; DNA-binding protein H-NS	1052.26	0.355523	<0.01
Gain	K06079	cutF, nlpE; copper homeostasis protein (lipoprotein)	296.952	0.355523	<0.01
Gain	K09893	rraB; regulator of ribonuclease activity B	389.063	0.355575	<0.01
Gain	K02024	lamB; maltoporin	405.513	0.355688	<0.01
Gain	K07290	yhjG; AsmA family protein	333.789	0.355991	<0.01
Gain	K08313	fsaA, mipB; fructose-6-phosphate aldolase 1 [EC:4.1.2.-]	288.369	0.356112	<0.01
Gain	K00138	aldB; aldehyde dehydrogenase [EC:1.2.1.-]	375.657	0.356548	<0.01
Gain	K02423	fliT; flagellar protein FliT	301.541	0.356677	<0.01
Gain	K01813	rhaA; L-rhamnose isomerase [EC:5.3.1.14]	1352.32	0.356977	<0.01
Gain	K11202	PTS-Fru2-EIIB; PTS system, fructose-specific IIB-like component [EC:2.7.1.-]	1009.34	0.357062	<0.01
Gain	K02170	bioH; pimeloyl-[acyl-carrier protein] methyl ester esterase [EC:3.1.1.85]	340.514	0.357207	<0.01
Gain	K00101	lldD; L-lactate dehydrogenase (cytochrome) [EC:1.1.2.3]	384.947	0.357276	<0.01
Gain	K06918	K06918; uncharacterized protein	400.553	0.357418	<0.01
Gain	K03747	smg; Smg protein	315.131	0.357457	<0.01
Gain	K02399	flgN; flagella synthesis protein FlgN	325.221	0.357483	<0.01
Gain	K03774	slpA; FKBP-type peptidyl-prolyl cis-trans isomerase SlpA [EC:5.2.1.8]	343.381	0.35756	<0.01
Gain	K11744	tqsA; AI-2 transport protein TqsA	301.647	0.357599	<0.01
Gain	K04027	eutM; ethanolamine utilization protein EutM	457.38	0.357919	<0.01
Gain	K19745	acuI; acrylyl-CoA reductase (NADPH) [EC:1.3.1.-]	341.646	0.357923	<0.01
Gain	K03597	rseA; sigma-E factor negative regulatory protein RseA	321.413	0.357939	<0.01
Gain	K01659	prpC; 2-methylcitrate synthase [EC:2.3.3.5]	338.437	0.358009	<0.01
Gain	K03576	metR; LysR family transcriptional regulator, regulator for metE and metH	352.601	0.358192	<0.01
Gain	K19228	sapC; cationic peptide transport system permease protein	388.196	0.358212	<0.01
Gain	K07243	FTR, FTH1, efeU; high-affinity iron transporter	354.871	0.358232	<0.01
Gain	K03181	ubiC; chorismate--pyruvate lyase [EC:4.1.3.40]	347.353	0.35839	<0.01
Gain	K12972	ghrA; glyoxylate/hydroxypyruvatereductase [EC:1.1.1.79 1.1.1.81]	355.12	0.358672	<0.01
Gain	K02532	lacY; MFS transporter, OHS family, lactose permease	907.225	0.358758	<0.01
Gain	K03304	tehA; tellurite resistance protein	293.815	0.3591	<0.01
Gain	K00156	poxB; pyruvate dehydrogenase (quinone) [EC:1.2.5.1]	410.787	0.359443	<0.01
Gain	K02381	fdrA; FdrA protein	291.548	0.360481	<0.01
Gain	K03658	helD; DNA helicase IV [EC:3.6.4.12]	449.19	0.360533	<0.01
Gain	K09978	K09978; uncharacterized protein	344.763	0.360667	<0.01
Gain	K09915	K09915; uncharacterized protein	341.973	0.360786	<0.01
Gain	K00598	tam; trans-aconitate 2-methyltransferase [EC:2.1.1.144]	360.693	0.361081	<0.01
Gain	K06203	cysZ; CysZ protein	519.696	0.361101	<0.01
Gain	K03556	malT; LuxR family transcriptional regulator, maltose regulon positive regulatory protein	340.39	0.361266	<0.01
Gain	K06175	truC; tRNA pseudouridine65 synthase [EC:5.4.99.26]	351.054	0.36203	<0.01
Gain	K02462	gspM; general secretion pathway protein M	299.603	0.362315	<0.01
Gain	K07309	ynfE; Tat-targeted selenate reductase subunit YnfE [EC:1.97.1.9]	378.451	0.362897	<0.01
Gain	K18850	ycfD; 50S ribosomal protein L16 3-hydroxylase [EC:1.14.11.47]	356.982	0.363302	<0.01
Gain	K03618	hyaF; hydrogenase-1 operon protein HyaF	298.773	0.363465	<0.01
Gain	K08310	nudB, ntpA; dihydroneopterin triphosphate diphosphatase [EC:3.6.1.67]	317.135	0.363575	<0.01
Gain	K02572	napF; ferredoxin-type protein NapF	302.328	0.364312	<0.01
Gain	K01070	frmB, ESD, fghA; S-formylglutathione hydrolase [EC:3.1.2.12]	678.786	0.364688	<0.01
Gain	K09781	K09781; uncharacterized protein	361.412	0.365052	<0.01
Gain	K05844	rimK; ribosomal protein S6--L-glutamate ligase [EC:6.3.2.-]	367.961	0.365223	<0.01
Gain	K01684	dgoD; galactonate dehydratase [EC:4.2.1.6]	373.27	0.36538	<0.01
Gain	K19338	nac; LysR family transcriptional regulator, nitrogen assimilation regulatory protein	306.568	0.365402	<0.01
Gain	K02458	gspI; general secretion pathway protein I	589.41	0.367139	<0.01
Gain	K10002	gltK, aatM; glutamate/aspartate transport system permease protein	354.125	0.367303	<0.01
Gain	K03690	ubiJ; ubiquinone biosynthesis protein UbiJ	357.698	0.367369	<0.01
Gain	K08219	UMF2; MFS transporter, UMF2 family, putative MFS family transporter protein	291.615	0.367399	<0.01
Gain	K07821	torY; trimethylamine-N-oxide reductase (cytochrome c), cytochrome c-type subunit TorY	302.924	0.367443	<0.01
Gain	K11740	nfrB; bacteriophage N4 adsorption protein B	284.747	0.36746	<0.01
Gain	K02460	gspK; general secretion pathway protein K	594.658	0.367534	<0.01
Gain	K03532	torC; trimethylamine-N-oxide reductase (cytochrome c), cytochrome c-type subunit TorC	320.906	0.367564	<0.01
Gain	K02844	waaG, rfaG; UDP-glucose:(heptosyl)LPS alpha-1,3-glucosyltransferase [EC:2.4.1.-]	327.819	0.367627	<0.01
Gain	K07008	egtC; gamma-glutamyl hercynylcysteine S-oxide hydrolase [EC:3.5.1.118]	795.512	0.367642	<0.01
Gain	K00130	betB, gbsA; betaine-aldehyde dehydrogenase [EC:1.2.1.8]	374.882	0.368469	<0.01
Gain	K10984	PTS-Gam-EIIB, agaB; PTS system, galactosamine-specific IIB component [EC:2.7.1.-]	279.843	0.368758	<0.01
Gain	K08317	ybdH; uncharacterized oxidoreductase [EC:1.1.-.-]	283.482	0.368784	<0.01
Gain	K09771	TC.SMR3; small multidrug resistance family-3 protein	387.064	0.369119	<0.01
Gain	K05982	E3.1.21.7, nfi; deoxyribonuclease V [EC:3.1.21.7]	298.57	0.369376	<0.01
Gain	K06952	K06952; uncharacterized protein	692.617	0.369834	<0.01
Gain	K01720	prpD; 2-methylcitrate dehydratase [EC:4.2.1.79]	304.271	0.369914	<0.01
Gain	K02299	cyoC; cytochrome o ubiquinol oxidase subunit III	319.203	0.370239	<0.01
Gain	K14348	lldR; GntR family transcriptional regulator, L-lactate dehydrogenase operon regulator	278.866	0.370727	<0.01
Gain	K03796	bax; Bax protein	427.782	0.37097	<0.01
Gain	K06221	dkgA; 2,5-diketo-D-gluconate reductase A [EC:1.1.1.346]	780.09	0.371234	<0.01
Gain	K13634	cysB; LysR family transcriptional regulator, cys regulon transcriptional activator	329.174	0.371428	<0.01
Gain	K02753	PTS-Asc-EIIC, ascF; PTS system, beta-glucoside (arbutin/salicin/cellobiose)-specific IIC component	279.255	0.371644	<0.01
Gain	K02173	yggC; putative kinase	279.969	0.371746	<0.01
Gain	K06132	clsC; cardiolipin synthase C [EC:2.7.8.-]	347.318	0.37192	<0.01
Gain	K07784	uhpT; MFS transporter, OPA family, hexose phosphate transport protein UhpT	289.479	0.372089	<0.01
Gain	K09788	prpF; 2-methylaconitate isomerase [EC:5.3.3.-]	321.998	0.37221	<0.01
Gain	K05875	tar; methyl-accepting chemotaxis protein II, aspartate sensor receptor	286.402	0.372324	<0.01
Gain	K08314	fsaB, talC; fructose-6-phosphate aldolase 2 [EC:4.1.2.-]	296.602	0.372396	<0.01
Gain	K13574	ybiC; uncharacterized oxidoreductase [EC:1.1.1.-]	306.679	0.372748	<0.01
Gain	K02167	betI; TetR/AcrR family transcriptional regulator, transcriptional repressor of bet genes	294.002	0.372756	<0.01
Gain	K08315	hycI; hydrogenase 3 maturation protease [EC:3.4.23.51]	531.356	0.372795	<0.01
Gain	K00758	deoA, TYMP; thymidine phosphorylase [EC:2.4.2.4]	328.181	0.372906	<0.01
Gain	K12368	dppA; dipeptide transport system substrate-binding protein	341.327	0.372915	<0.01
Gain	K13635	cbl; LysR family transcriptional regulator, cys regulon transcriptional activator	325.711	0.373117	<0.01
Gain	K09612	iap; alkaline phosphatase isozyme conversion protein [EC:3.4.11.-]	309.07	0.373207	<0.01
Gain	K19166	higB; mRNA interferase HigB [EC:3.1.-.-]	274.998	0.373252	<0.01
Gain	K07340	ybbJ; inner membrane protein	379.303	0.37335	<0.01
Gain	K00835	avtA; valine--pyruvate aminotransferase [EC:2.6.1.66]	325.237	0.373611	<0.01
Gain	K14414	rtcR; transcriptional regulatory protein RtcR	280.915	0.373981	<0.01
Gain	K02452	gspC; general secretion pathway protein C	571.725	0.374028	<0.01
Gain	K07797	emrK; multidrug resistance protein K	267.862	0.374355	<0.01
Gain	K00117	gcd; quinoprotein glucose dehydrogenase [EC:1.1.5.2]	327.194	0.374955	<0.01
Gain	K08094	hxlB; 6-phospho-3-hexuloisomerase [EC:5.3.1.27]	601.358	0.375068	<0.01
Gain	K12784	tir; translocated intimin receptor	266.193	0.375097	<0.01
Gain	K12214	icmL, traM, dotI; intracellular multiplication protein IcmL	266.29	0.37515	<0.01
Gain	K00299	ssuE; FMN reductase [EC:1.5.1.38]	316.366	0.375221	<0.01
Gain	K02459	gspJ; general secretion pathway protein J	576.36	0.375343	<0.01
Gain	K10939	acfD; accessory colonization factor AcfD	267.585	0.375421	<0.01
Gain	K05373	ybtX, irp8; MFS transporter, putative signal transducer	267.443	0.375513	<0.01
Gain	K19156	prlF, sohA; antitoxin PrlF	266.771	0.375654	<0.01
Gain	K11739	nfrA; bacteriophage N4 adsorption protein A	267.862	0.375895	<0.01
Gain	K02784	PTS-HPR.PTSH, ptsH; phosphocarrier protein HPr	400.895	0.376012	<0.01
Gain	K05523	hchA; D-lactate dehydratase / protein deglycase [EC:4.2.1.130 3.5.1.124]	290.172	0.376032	<0.01
Gain	K15721	fyuA; pesticin/yersiniabactin receptor	266.66	0.376039	<0.01
Gain	K07495	K07495; putative transposase	266.193	0.376304	<0.01
Gain	K05835	rhtC; threonine efflux protein	281.157	0.376321	<0.01
Gain	K12518	papC; outer membrane usher protein PapC	266.193	0.376339	<0.01
Gain	K06156	gntU; Gnt-I system low-affinity gluconate transporter	304.56	0.376488	<0.01
Gain	K17938	sbmA, bacA; peptide/bleomycin uptake transporter	288.551	0.376503	<0.01
Gain	K02300	cyoD; cytochrome o ubiquinol oxidase subunit IV	307.274	0.376529	<0.01
Gain	K03224	yscN, sctN, hrcN, ssaN; ATP synthase in type III secretion protein N [EC:3.6.3.14]	271.835	0.376546	<0.01
Gain	K19304	mepM; murein DD-endopeptidase [EC:3.4.24.-]	433.7	0.376605	<0.01
Gain	K09934	K09934; uncharacterized protein	268.054	0.376635	<0.01
Gain	K07486	K07486; transposase	304.112	0.376711	<0.01
Gain	K02450	gspA; general secretion pathway protein A	281.391	0.376871	<0.01
Gain	K02550	glcA; glycolate permease	266.603	0.376885	<0.01
Gain	K17722	preT; dihydropyrimidine dehydrogenase (NAD+) subunit PreT [EC:1.3.1.1]	291.436	0.377176	<0.01
Gain	K05372	ybtA; AraC family transcriptional regulator	266.532	0.377177	<0.01
Gain	K12209	icmE, dotG; intracellular multiplication protein IcmE	266.193	0.377281	<0.01
Gain	K02457	gspH; general secretion pathway protein H	574.946	0.377351	<0.01
Gain	K12205	dotD, traH; defect in organelle trafficking protein DotD	266.29	0.377432	<0.01
Gain	K04784	irp2, HMWP2; yersiniabactin nonribosomal peptide synthetase	269.243	0.377447	<0.01
Gain	K04786	irp1, HMWP1; yersiniabactin nonribosomal peptide/polyketide synthase	266.287	0.377519	<0.01
Gain	K16370	pfkB; 6-phosphofructokinase 2 [EC:2.7.1.11]	286.321	0.37757	<0.01
Gain	K16140	uidC, gusC; putative glucuronide porin	266.603	0.377741	<0.01
Gain	K03220	yscD, sctD, ssaD; type III secretion protein D	268.658	0.377775	<0.01
Gain	K02298	cyoB; cytochrome o ubiquinol oxidase subunit I [EC:1.10.3.10]	307.816	0.377822	<0.01
Gain	K13743	ipgB2; protein IpgB2	266.193	0.377892	<0.01
Gain	K04065	osmY; hyperosmotically inducible periplasmic protein	299.815	0.377928	<0.01
Gain	K12687	flu; antigen 43	266.203	0.377947	<0.01
Gain	K19577	ydhP; MFS transporter, DHA1 family, inner membrane transport protein	340.266	0.378037	<0.01
Gain	K07780	appY; AraC family transcriptional regulator, transcriptional regulator required for anaerobic and stationary phase induction of genes	266.193	0.378052	<0.01
Gain	K11006	stxA; shiga toxin subunit A	266.193	0.378072	<0.01
Gain	K07662	cpxR; two-component system, OmpR family, response regulator CpxR	364.747	0.378213	<0.01
Gain	K18479	yihS; sulfoquinovose isomerase [EC:5.3.1.31]	268.45	0.37822	<0.01
Gain	K12517	papA; major pilin subunit PapA	266.193	0.37823	<0.01
Gain	K14060	pinR; putative DNA-invertase from lambdoid prophage Rac	267.738	0.378427	<0.01
Gain	K12788	espH; LEE-encoded effector EspH	266.193	0.378493	<0.01
Gain	K05800	ybaO; Lrp/AsnC family transcriptional regulator	404.592	0.378532	<0.01
Gain	K06908	K06908; uncharacterized protein	552.577	0.378539	<0.01
Gain	K12218	icmP, trbA; intracellular multiplication protein IcmP	266.29	0.378556	<0.01
Gain	K02080	agaI; galactosamine-6-phosphate isomerase [EC:5.3.1.-]	273.2	0.378618	<0.01
Gain	K10550	alsC; D-allose transport system permease protein	270.622	0.378699	<0.01
Gain	K19789	radD; DNA repair protein RadD	293.101	0.378746	<0.01
Gain	K03228	yscT, sctT, hrcT, ssaT; type III secretion protein T	272.365	0.378809	<0.01
Gain	K02688	prpR; transcriptional regulator, propionate catabolism operon regulatory protein	292.303	0.379046	<0.01
Gain	K07279	yfaL; autotransporter family porin	266.603	0.379101	<0.01
Gain	K12222	icmT, traK; intracellular multiplication protein IcmT	266.29	0.379117	<0.01
Gain	K01355	ompT; omptin [EC:3.4.23.49]	266.213	0.379128	<0.01
Gain	K10985	PTS-Gam-EIIC, agaC; PTS system, galactosamine-specific IIC component	269.79	0.379388	<0.01
Gain	K09980	K09980; uncharacterized protein	277.637	0.379435	<0.01
Gain	K03226	yscR, sctR, hrcR, ssaR; type III secretion protein R	272.294	0.379551	<0.01
Gain	K10124	bglH; carbohydrate-specific outer membrane porin	268.96	0.379622	<0.01
Gain	K08351	bisC; biotin/methionine sulfoxide reductase [EC:1.-.-.-]	308.488	0.379639	<0.01
Gain	K13243	dos; c-di-GMP-specific phosphodiesterase [EC:3.1.4.52]	266.624	0.37967	<0.01
Gain	K01466	allB; allantoinase [EC:3.5.2.5]	367.747	0.379688	<0.01
Gain	K06078	lpp; murein lipoprotein	650.544	0.379711	<0.01
Gain	K12519	papD; chaperone protein PapD	266.193	0.37975	<0.01
Gain	K03219	yscC, sctC, ssaC; type III secretion protein C	271.365	0.379813	<0.01
Gain	K04785	irp3, ybtU; yersiniabactin synthetase, thiazolinyl reductase component	266.287	0.379818	<0.01
Gain	K16042	nleH; non-LEE-encoded effector NleH	532.386	0.37985	<0.01
Gain	K03221	yscF, sctF, ssaG, prgI; type III secretion protein F	267.959	0.379936	<0.01
Gain	K12203	dotB, traJ; defect in organelle trafficking protein DotB	266.29	0.380027	<0.01
Gain	K00094	E1.1.1.251, gatD; galactitol-1-phosphate 5-dehydrogenase [EC:1.1.1.251]	270.343	0.380124	<0.01
Gain	K06197	chaB; cation transport regulator	270.268	0.380132	<0.01
Gain	K07314	pphB; serine/threonine protein phosphatase 2 [EC:3.1.3.16]	267.208	0.380205	<0.01
Gain	K03721	tyrR; transcriptional regulator of aroF, aroG, tyrA and aromatic amino acid transport	329.88	0.380277	<0.01
Gain	K09456	aidB; putative acyl-CoA dehydrogenase	315.929	0.38028	<0.01
Gain	K17948	nanM; N-acetylneuraminate epimerase [EC:5.1.3.24]	269.031	0.380454	<0.01
Gain	K12204	dotC, traI; defect in organelle trafficking protein DotC	266.29	0.38066	<0.01
Gain	K16346	xanQ; xanthine permease XanQ	268.802	0.380687	<0.01
Gain	K02297	cyoA; cytochrome o ubiquinol oxidase subunit II [EC:1.10.3.10]	307.545	0.380736	<0.01
Gain	K03808	pqiA; paraquat-inducible protein A	712.197	0.380753	<0.01
Gain	K00879	fucK; L-fuculokinase [EC:2.7.1.51]	973.694	0.380796	<0.01
Gain	K12371	dppD; dipeptide transport system ATP-binding protein	317.946	0.380891	<0.01
Gain	K07227	chuX; heme iron utilization protein	321.384	0.380976	<0.01
Gain	K19155	yhaV; toxin YhaV [EC:3.1.-.-]	266.699	0.38098	<0.01
Gain	K05782	benE; benzoate membrane transport protein	333.373	0.380986	<0.01
Gain	K07026	E3.1.3.70; mannosyl-3-phosphoglycerate phosphatase [EC:3.1.3.70]	274.135	0.380998	<0.01
Gain	K19777	hdeA; acid stress chaperone HdeA	267.782	0.381011	<0.01
Gain	K06946	K06946; uncharacterized protein	536.571	0.381098	<0.01
Gain	K03623	yhcO; ribonuclease inhibitor	287.41	0.381129	<0.01
Gain	K10975	allP; allantoin permease	268.049	0.381132	<0.01
Gain	K03761	kgtP; MFS transporter, MHS family, alpha-ketoglutarate permease	302.443	0.381236	<0.01
Gain	K05596	iciA; LysR family transcriptional regulator, chromosome initiation inhibitor	328.66	0.381312	<0.01
Gain	K02464	gspO; general secretion pathway protein O [EC:3.4.23.43 2.1.1.-]	269.072	0.381369	<0.01
Gain	K18919	hokC_D; protein HokC/D	532.805	0.381449	<0.01
Gain	K12370	dppC; dipeptide transport system permease protein	318.046	0.381624	<0.01
Gain	K10003	gltJ, aatQ; glutamate/aspartate transport system permease protein	355.139	0.381693	<0.01
Gain	K11250	leuE; leucine efflux protein	333.398	0.381746	<0.01
Gain	K12372	dppF; dipeptide transport system ATP-binding protein	318.313	0.381746	<0.01
Gain	K01160	rusA; crossover junction endodeoxyribonuclease RusA [EC:3.1.22.4]	1068.19	0.381875	<0.01
Gain	K05374	irp4, ybtT; yersiniabactin synthetase, thioesterase component	266.287	0.381934	<0.01
Gain	K02362	entD; enterobactin synthetase component D [EC:6.3.2.14 2.7.8.-]	297.894	0.381994	<0.01
Gain	K02436	gatR; DeoR family transcriptional regulator, galactitol utilization operon repressor	269.789	0.382064	<0.01
Gain	K09024	rutF; flavin reductase [EC:1.5.1.-]	310.832	0.382183	<0.01
Gain	K10972	allS; LysR family transcriptional regulator, transcriptional activator of the allD operon	268.701	0.38225	<0.01
Gain	K12227	K12227, traL; TraL protein	266.193	0.382394	<0.01
Gain	K02461	gspL; general secretion pathway protein L	577.249	0.382561	<0.01
Gain	K12786	espF; LEE-encoded effector EspF	266.193	0.382718	<0.01
Gain	K11474	glcC; GntR family transcriptional regulator, glc operon transcriptional activator	276.934	0.382775	<0.01
Gain	K15551	tauA; taurine transport system substrate-binding protein	289.536	0.382924	<0.01
Gain	K12787	map; LEE-encoded effector Map	266.193	0.38294	<0.01
Gain	K12660	rhmA; 2-dehydro-3-deoxy-L-rhamnonate aldolase [EC:4.1.2.53]	273.614	0.383011	<0.01
Gain	K12790	eae; intimin	266.193	0.383133	<0.01
Gain	K13654	mcbR; GntR family transcriptional regulator, colanic acid and biofilm gene transcriptional regulator	267.48	0.383133	<0.01
Gain	K10551	alsA; D-allose transport system ATP-binding protein [EC:3.6.3.17]	270.622	0.383155	<0.01
Gain	K07286	yajG; uncharacterized lipoprotein	305.483	0.383242	<0.01
Gain	K11747	kefB; glutathione-regulated potassium-efflux system protein KefB	352.885	0.383345	<0.01
Gain	K10986	PTS-Gam-EIID, agaD; PTS system, galactosamine-specific IID component	269.79	0.383371	<0.01
Gain	K07786	emrY; MFS transporter, DHA2 family, multidrug resistance protein	267.862	0.383373	<0.01
Gain	K03230	yscV, sctV, hrcV, ssaV, invA; type III secretion protein V	271.699	0.383512	<0.01
Gain	K03836	tnaB; low affinity tryptophan permease	266.624	0.383573	<0.01
Gain	K03222	yscJ, sctJ, hrcJ, ssaJ; type III secretion protein J	271.721	0.383576	<0.01
Gain	K03227	yscS, sctS, hrcS, ssaS; type III secretion protein S	271.858	0.383633	<0.01
Gain	K09953	lpxR; lipid A 3-O-deacylase	266.799	0.383845	<0.01
Gain	K04046	yegD; hypothetical chaperone protein	326.62	0.38394	<0.01
Gain	K07493	K07493; putative transposase	534.272	0.384004	<0.01
Gain	K15550	mdtP; outer membrane protein, multidrug efflux system	268.962	0.384307	<0.01
Gain	K07471	ygiV; probable transcriptional regulator	266.193	0.384307	<0.01
Gain	K13381	chiA; bifunctional chitinase/lysozyme [EC:3.2.1.14 3.2.1.17]	266.603	0.384375	<0.01
Gain	K12213	icmK, traN, dotH; intracellular multiplication protein IcmK	266.29	0.384575	<0.01
Gain	K14744	rzpD; prophage endopeptidase [EC:3.4.-.-]	1343.27	0.384602	<0.01
Gain	K03919	alkB; DNA oxidative demethylase [EC:1.14.11.33]	301.53	0.384658	<0.01
Gain	K06445	fadE; acyl-CoA dehydrogenase [EC:1.3.99.-]	335.643	0.384752	<0.01
Gain	K15831	hycF; formate hydrogenlyase subunit 6	283.175	0.38476	<0.01
Gain	K05774	phnN; ribose 1,5-bisphosphokinase [EC:2.7.4.23]	322.097	0.384808	<0.01
Gain	K03607	proQ; ProP effector	666.204	0.384832	<0.01
Gain	K12684	esp, sigA, sepA; serine protease autotransporter [EC:3.4.21.-]	536.132	0.384868	<0.01
Gain	K12369	dppB; dipeptide transport system permease protein	317.946	0.384876	<0.01
Gain	K11606	sitD; manganese/iron transport system permease protein	294.198	0.385076	<0.01
Gain	K12266	norR; anaerobic nitric oxide reductase transcription regulator	292.139	0.385338	<0.01
Gain	K16074	zntB; zinc transporter	333.377	0.385344	<0.01
Gain	K00713	waaD; UDP-glucose:(glucosyl)LPS alpha-1,2-glucosyltransferase [EC:2.4.1.-]	266.193	0.385561	<0.01
Gain	K04783	irp5, ybtE; yersiniabactin salicyl-AMP ligase [EC:6.3.2.-]	268.404	0.385892	<0.01
Gain	K10831	tauB; taurine transport system ATP-binding protein [EC:3.6.3.36]	290.399	0.38593	<0.01
Gain	K12217	icmO, trbC, dotL; intracellular multiplication protein IcmO	266.406	0.385984	<0.01
Gain	K06159	yojI; multidrug/microcin transport system ATP-binding/permease protein	309.736	0.386033	<0.01
Gain	K11183	PTS-HPR.FRUB, fruB, fpr; phosphocarrier protein FPr	665.323	0.38609	<0.01
Gain	K03225	yscQ, sctQ, hrcQ, ssaQ, spaO; type III secretion protein Q	271.564	0.386098	<0.01
Gain	K06165	phnH; alpha-D-ribose 1-methylphosphonate 5-triphosphate synthase subunit PhnH [EC:2.7.8.37]	326.563	0.386105	<0.01
Gain	K02680	ppdB; prepilin peptidase dependent protein B	293.499	0.386266	<0.01
Gain	K12785	espG, virA; LEE-encoded effector EspG	266.193	0.386443	<0.01
Gain	K10973	allR; IclR family transcriptional regulator, negative regulator of allantoin and glyoxylate utilization operons	267.43	0.386564	<0.01
Gain	K04781	mbtI, irp9, ybtS; salicylate synthetase [EC:5.4.4.2 4.2.99.21]	267.376	0.386644	<0.01
Gain	K06157	idnT; Gnt-II system L-idonate transporter	267.311	0.386731	<0.01
Gain	K05778	ABC.VB1X.P; putative thiamine transport system permease protein	284.23	0.386809	<0.01
Gain	K18920	hokA; protein HokA	536.392	0.386889	<0.01
Gain	K07645	qseC; two-component system, OmpR family, sensor histidine kinase QseC [EC:2.7.13.3]	335.939	0.386978	<0.01
Gain	K08298	caiB; L-carnitine CoA-transferase [EC:2.8.3.21]	292.096	0.387003	<0.01
Gain	K07358	fimE; type 1 fimbriae regulatory protein FimE	270.092	0.387213	<0.01
Gain	K19168	cptA; toxin CptA	299.426	0.387306	<0.01
Gain	K05802	mscK, kefA, aefA; potassium-dependent mechanosensitive channel	682.188	0.387475	<0.01
Gain	K03278	waaI, rfaI; UDP-D-galactose:(glucosyl)LPS alpha-1,3-D-galactosyltransferase [EC:2.4.1.44]	269.788	0.387537	<0.01
Gain	K11192	PTS-Mur-EIIC, murP; PTS system, N-acetylmuramic acid-specific IIC component	271.497	0.387552	<0.01
Gain	K08319	ltnD; L-threonate 2-dehydrogenase [EC:1.1.1.411]	273.578	0.38773	<0.01
Gain	K12206	icmB, dotO; intracellular multiplication protein IcmB	266.29	0.387973	<0.01
Gain	K10036	glnH; glutamine transport system substrate-binding protein	316.393	0.388045	<0.01
Gain	K01631	dgoA; 2-dehydro-3-deoxyphosphogalactonate aldolase [EC:4.1.2.21]	577.952	0.388082	<0.01
Gain	K08297	caiA; crotonobetainyl-CoA dehydrogenase [EC:1.3.8.13]	274.341	0.388184	<0.01
Gain	K09016	rutG; putative pyrimidine permease RutG	271.14	0.388186	<0.01
Gain	K19268	glmE, mutE, mamB; methylaspartate mutase epsilon subunit [EC:5.4.99.1]	154.91	0.388196	<0.01
Gain	K12661	LRA3, yfaW; L-rhamnonate dehydratase [EC:4.2.1.90]	274.409	0.388241	<0.01
Gain	K18838	cbeA; cytoskeleton bundling-enhancing protein CbeA and related proteins	539.411	0.388451	<0.01
Gain	K07357	fimB; type 1 fimbriae regulatory protein FimB	538.572	0.388489	<0.01
Gain	K09020	rutB; ureidoacrylate peracid hydrolase [EC:3.5.1.110]	275.995	0.388602	<0.01
Gain	K03229	yscU, sctU, hrcU, ssaU; type III secretion protein U	272.365	0.388723	<0.01
Gain	K10549	alsB; D-allose transport system substrate-binding protein	270.764	0.388765	<0.01
Gain	K00370	narG, narZ, nxrA; nitrate reductase / nitrite oxidoreductase, alpha subunit [EC:1.7.5.1 1.7.99.-]	595.7	0.388828	<0.01
Gain	K10805	tesB; acyl-CoA thioesterase II [EC:3.1.2.-]	357.997	0.388951	<0.01
Gain	K12516	bigA; putative surface-exposed virulence protein	270.257	0.388978	<0.01
Gain	K18922	hokE; protein HokE	541.007	0.389017	<0.01
Gain	K13938	folM; dihydromonapterin reductase / dihydrofolate reductase [EC:1.5.1.50 1.5.1.3]	291.789	0.389221	<0.01
Gain	K04753	sufI; suppressor of ftsI	287.322	0.389268	<0.01
Gain	K05777	ABC.VB1X.S; putative thiamine transport system substrate-binding protein	284.23	0.389287	<0.01
Gain	K10537	araF; L-arabinose transport system substrate-binding protein	281.708	0.389322	<0.01
Gain	K02439	glpE; thiosulfate sulfurtransferase [EC:2.8.1.1]	321.672	0.389329	<0.01
Gain	K03672	trxC; thioredoxin 2 [EC:1.8.1.8]	334.278	0.389368	<0.01
Gain	K08302	gatY-kbaY; tagatose 1,6-diphosphate aldolase GatY/KbaY [EC:4.1.2.40]	2323.31	0.389584	<0.01
Gain	K08323	rspA, manD; mannonate dehydratase [EC:4.2.1.8]	675.736	0.389645	<0.01
Gain	K09018	rutA; pyrimidine oxygenase [EC:1.14.99.46]	274.939	0.389877	<0.01
Gain	K04091	ssuD; alkanesulfonate monooxygenase [EC:1.14.14.5]	341.065	0.389893	<0.01
Gain	K16077	scrY; sucrose porin	277.427	0.390143	<0.01
Gain	K10857	exoX; exodeoxyribonuclease X [EC:3.1.11.-]	328.205	0.390346	<0.01
Gain	K03669	mdoH; membrane glycosyltransferase [EC:2.4.1.-]	334.753	0.390397	<0.01
Gain	K12149	dinI; DNA-damage-inducible protein I	816.448	0.390403	<0.01
Gain	K04016	nrfE; cytochrome c-type biogenesis protein NrfE	281.03	0.39059	<0.01
Gain	K18837	cbtA; cytoskeleton-binding toxin CbtA and related proteins	536.427	0.3906	<0.01
Gain	K04334	csgA; major curlin subunit	276.585	0.390608	<0.01
Gain	K12944	nudI; nucleoside triphosphatase [EC:3.6.1.-]	276.858	0.390695	<0.01
Gain	K00090	ghrB; glyoxylate/hydroxypyruvate/2-ketogluconate reductase [EC:1.1.1.79 1.1.1.81 1.1.1.215]	283.812	0.391013	<0.01
Gain	K07349	fimG; minor fimbrial subunit	270.414	0.391052	<0.01
Gain	K13639	soxR; MerR family transcriptional regulator, redox-sensitive transcriptional activator SoxR	312.071	0.391107	<0.01
Gain	K05880	dhaR; transcriptional activator for dhaKLM operon	280.934	0.39111	<0.01
Gain	K09988	lyxA; D-lyxose ketol-isomerase [EC:5.3.1.15]	384.098	0.391186	<0.01
Gain	K19163	ccdB; toxin CcdB	269.963	0.391249	<0.01
Gain	K09023	rutD; aminoacrylate hydrolase [EC:3.5.1.-]	274.699	0.391321	<0.01
Gain	K07677	rcsC; two-component system, NarL family, capsular synthesis sensor histidine kinase RcsC [EC:2.7.13.3]	280.339	0.391337	<0.01
Gain	K11477	glcG; glc operon protein GlcG	278.257	0.391384	<0.01
Gain	K01671	yihT; sulfofructosephosphate aldolase [EC:4.1.2.57]	273.129	0.391518	<0.01
Gain	K06222	dkgB; 2,5-diketo-D-gluconate reductase B [EC:1.1.1.346]	282.411	0.391762	<0.01
Gain	K02168	betT, betS; choline/glycine/proline betaine transport protein	367.875	0.391797	<0.01
Gain	K19238	pmrD; signal transduction protein PmrD	272.687	0.391935	<0.01
Gain	K04025	eutK; ethanolamine utilization protein EutK	276.586	0.392003	<0.01
Gain	K00673	astA; arginine N-succinyltransferase [EC:2.3.1.109]	315.083	0.392073	<0.01
Gain	K11203	PTS-Fru2-EIIC; PTS system, fructose-specific IIC-like component	573.961	0.392119	<0.01
Gain	K18862	ldrA_B_C_D; small toxic polypeptide LdrA/B/C/D	806.285	0.392135	<0.01
Gain	K07687	rcsB; two-component system, NarL family, captular synthesis response regulator RcsB	284.33	0.392245	<0.01
Gain	K03675	grxB; glutaredoxin 2	272.206	0.392255	<0.01
Gain	K08276	eco; ecotin	285.849	0.392274	<0.01
Gain	K09975	K09975; uncharacterized protein	306.919	0.392383	<0.01
Gain	K12113	ebgR; LacI family transcriptional regulator, ebg operon repressor	278.329	0.392403	<0.01
Gain	K03819	wcaB; putative colanic acid biosynthesis acetyltransferase WcaB [EC:2.3.1.-]	272.372	0.392546	<0.01
Gain	K07641	creC; two-component system, OmpR family, sensor histidine kinase CreC [EC:2.7.13.3]	330.155	0.39257	<0.01
Gain	K08279	caiE; carnitine operon protein CaiE	273.217	0.392621	<0.01
Gain	K03765	cadC; transcriptional activator of cad operon	276.099	0.392628	<0.01
Gain	K03490	chbR, celD; AraC family transcriptional regulator, dual regulator of chb operon	279.289	0.392714	<0.01
Gain	K16321	gntP; high-affinity gluconate transporter	272.206	0.392749	<0.01
Gain	K12289	hofN; pilus assembly protein HofN	277.34	0.392875	<0.01
Gain	K09021	rutC; aminoacrylate peracid reductase	274.833	0.392974	<0.01
Gain	K03207	wcaH; colanic acid biosynthesis protein WcaH [EC:3.6.1.-]	273.084	0.393101	<0.01
Gain	K07647	torS; two-component system, OmpR family, sensor histidine kinase TorS [EC:2.7.13.3]	273.871	0.393111	<0.01
Gain	K03638	moaB; molybdopterin adenylyltransferase [EC:2.7.7.75]	631.911	0.393124	<0.01
Gain	K19776	dgoR; GntR family transcriptional regulator, galactonate operon transcriptional repressor	274.121	0.393185	<0.01
Gain	K05779	ABC.VB1X.A; putative thiamine transport system ATP-binding protein	284.23	0.393193	<0.01
Gain	K07811	torA; trimethylamine-N-oxide reductase (cytochrome c) [EC:1.7.2.3]	305.534	0.393204	<0.01
Gain	K04017	nrfF; formate-dependent nitrite reductase complex subunit NrfF	276.151	0.393264	<0.01
Gain	K15829	hycD; formate hydrogenlyase subunit 4	278.012	0.393275	<0.01
Gain	K03855	fixX; ferredoxin like protein	281.192	0.393301	<0.01
Gain	K02814	PTS-Sor-EIIC, sorA; PTS system, sorbose-specific IIC component	282.492	0.393323	<0.01
Gain	K10037	glnP; glutamine transport system permease protein	307.879	0.393335	<0.01
Gain	K08308	mltE, emtA; membrane-bound lytic murein transglycosylase E [EC:4.2.2.-]	283.273	0.393352	<0.01
Gain	K16076	nmpC, ompD; outer membrane porin protein LC	278.069	0.393356	<0.01
Gain	K08162	mdtH; MFS transporter, DHA1 family, multidrug resistance protein	282.955	0.393412	<0.01
Gain	K14053	ompG; outer membrane protein G	273.96	0.393431	<0.01
Gain	K01484	astB; succinylarginine dihydrolase [EC:3.5.3.23]	303.482	0.393462	<0.01
Gain	K18898	mdtE; membrane fusion protein, multidrug efflux system	271.985	0.393496	<0.01
Gain	K12943	ygeR; lipoprotein YgeR	274.952	0.393536	<0.01
Gain	K05594	elaB; ElaB protein	274.992	0.393566	<0.01
Gain	K13684	wcaC; putative colanic acid biosynthesis glycosyltransferase [EC:2.4.-.-]	272.204	0.393566	<0.01
Gain	K13620	wcaD; putative colanic acid polymerase	272.204	0.393585	<0.01
Gain	K07663	creB; two-component system, OmpR family, catabolic regulation response regulator CreB	317.175	0.393624	<0.01
Gain	K06146	idnR, gntH; LacI family transcriptional regulator, gluconate utilization system Gnt-II transcriptional activator	272.264	0.39363	<0.01
Gain	K16136	malI; LacI family transcriptional regulator, maltose regulon regulatory protein	282.248	0.393656	<0.01
Gain	K08172	shiA; MFS transporter, MHS family, shikimate and dehydroshikimate transport protein	274.61	0.393677	<0.01
Gain	K19234	ynhG; L,D-transpeptidase YnhG	274.952	0.393695	<0.01
Gain	K13650	mcbA; MqsR-controlled colanic acid and biofilm protein A	273.552	0.393708	<0.01
Gain	K15547	mdtO; multidrug resistance protein MdtO	281.711	0.39371	<0.01
Gain	K16324	psuT; putative pseudouridine transporter	276.809	0.393729	<0.01
Gain	K16711	wcaM; colanic acid biosynthesis protein WcaM	272.204	0.39388	<0.01
Gain	K15922	yihQ; sulfoquinovosidase [EC:3.2.1.199]	275.975	0.393893	<0.01
Gain	K08163	mdtL; MFS transporter, DHA1 family, multidrug resistance protein	280.385	0.393927	<0.01
Gain	K13480	ygeU, xdhC; xanthine dehydrogenase iron-sulfur-binding subunit	268.243	0.393971	<0.01
Gain	K08318	yihU; 4-hydroxybutyrate dehydrogenase / sulfolactaldehyde 3-reductase [EC:1.1.1.61 1.1.1.373]	274.805	0.393978	<0.01
Gain	K05876	trg; methyl-accepting chemotaxis protein III, ribose and galactose sensor receptor	272.947	0.394061	<0.01
Gain	K07660	phoP; two-component system, OmpR family, response regulator PhoP	310.693	0.394075	<0.01
Gain	K03972	pspE; phage shock protein E	286.816	0.394078	<0.01
Gain	K03668	hslJ; heat shock protein HslJ	295.342	0.394158	<0.01
Gain	K03812	rmf; ribosome modulation factor	303.073	0.394284	<0.01
Gain	K09909	K09909; uncharacterized protein	316.729	0.394289	<0.01
Gain	K04333	csgD; LuxR family transcriptional regulator, csgAB operon transcriptional regulatory protein	278.151	0.39434	<0.01
Gain	K12962	arnE; undecaprenyl phosphate-alpha-L-ara4N flippase subunit ArnE	286.783	0.394348	<0.01
Gain	K08194	dgoT; MFS transporter, ACS family, D-galactonate transporter	276.74	0.394358	<0.01
Gain	K18148	rtcB; release factor H-coupled RctB family protein	274.591	0.394443	<0.01
Gain	K11746	kefF; glutathione-regulated potassium-efflux system ancillary protein KefF	284.412	0.394493	<0.01
Gain	K03485	treR; LacI family transcriptional regulator, trehalose operon repressor	281.976	0.39456	<0.01
Gain	K07592	tdcA; LysR family transcriptional regulator, tdc operon transcriptional activator	276.14	0.394611	<0.01
Gain	K05887	ydiB; quinate/shikimate dehydrogenase [EC:1.1.1.282]	272.59	0.394669	<0.01
Gain	K01608	gcl; tartronate-semialdehyde synthase [EC:4.1.1.47]	556.721	0.394672	<0.01
Gain	K13890	gsiC; glutathione transport system permease protein	294.087	0.394695	<0.01
Gain	K06906	K06906; uncharacterized protein	547.916	0.39475	<0.01
Gain	K18899	mdtF; multidrug efflux pump	271.985	0.394779	<0.01
Gain	K00322	sthA, udhA; NAD(P) transhydrogenase [EC:1.6.1.1]	341.238	0.394809	<0.01
Gain	K09916	K09916; uncharacterized protein	321.44	0.394845	<0.01
Gain	K16322	pit; low-affinity inorganic phosphate transporter	551.023	0.394875	<0.01
Gain	K05798	leuO; LysR family transcriptional regulator, transcriptional activator for leuABCD operon	280.679	0.394905	<0.01
Gain	K09477	citT; citrate:succinate antiporter	277.403	0.394916	<0.01
Gain	K02182	caiC; carnitine-CoA ligase [EC:6.2.1.48]	279.526	0.394929	<0.01
Gain	K15722	cedA; cell division activator	274.938	0.394954	<0.01
Gain	K18829	mvpT, vapB; antitoxin VapB	287.985	0.394997	<0.01
Gain	K02317	dnaT; DNA replication protein DnaT	276.344	0.395196	<0.01
Gain	K07264	arnT, pmrK; 4-amino-4-deoxy-L-arabinose transferase [EC:2.4.2.43]	285.89	0.39523	<0.01
Gain	K12290	hofO; pilus assembly protein HofO	273.147	0.395241	<0.01
Gain	K07350	fimH; minor fimbrial subunit	277.573	0.395249	<0.01
Gain	K07225	hmuS; putative hemin transport protein	322.292	0.395319	<0.01
Gain	K12678	aidA-I, misL; autotransporter family porin	290.885	0.395373	<0.01
Gain	K02364	entF; enterobactin synthetase component F [EC:6.3.2.14]	278.039	0.395498	<0.01
Gain	K01766	csdA; cysteine sulfinate desulfinase [EC:4.4.1.-]	299.695	0.395611	<0.01
Gain	K10017	hisP; histidine transport system ATP-binding protein [EC:3.6.3.21]	278.962	0.395665	<0.01
Gain	K06899	ndpA; nucleoid-associated protein	299.917	0.395672	<0.01
Gain	K09918	K09918; uncharacterized protein	293.84	0.395893	<0.01
Gain	K03757	cadB; cadaverine:lysine antiporter	278.692	0.395936	<0.01
Gain	K11732	pheP; phenylalanine-specific permease	274.952	0.395967	<0.01
Gain	K03279	waaJ, rfaJ; UDP-glucose:(galactosyl)LPS alpha-1,2-glucosyltransferase [EC:2.4.1.58]	273.985	0.396046	<0.01
Gain	K02846	solA; N-methyl-L-tryptophan oxidase [EC:1.5.3.-]	281.115	0.396067	<0.01
Gain	K05245	caiT; L-carnitine/gamma-butyrobetaine antiporter	274.286	0.396083	<0.01
Gain	K15828	hycC; formate hydrogenlyase subunit 3	278.012	0.3961	<0.01
Gain	K09475	ompC; outer membrane pore protein C	548.756	0.396165	<0.01
Gain	K19164	ccdA; antitoxin CcdA	270.478	0.39619	<0.01
Gain	K02255	ftnB; ferritin-like protein 2	274.952	0.396208	<0.01
Gain	K11201	PTS-Fru2-EIIA; PTS system, fructose-specific IIA-like component [EC:2.7.1.-]	544.203	0.396218	<0.01
Gain	K15773	hipB; HTH-type transcriptional regulator / antitoxin HipB	287.272	0.396242	<0.01
Gain	K07589	folX; D-erythro-7,8-dihydroneopterin triphosphate epimerase [EC:5.1.99.7]	288.289	0.396299	<0.01
Gain	K03759	adiC; arginine:agmatine antiporter	277.703	0.396324	<0.01
Gain	K02972	sra; stationary-phase-induced ribosome-associated protein	274.952	0.396437	<0.01
Gain	K00883	dgoK; 2-dehydro-3-deoxygalactonokinase [EC:2.7.1.58]	575.332	0.396464	<0.01
Gain	K15836	fhlA; formate hydrogenlyase transcriptional activator	313.238	0.39648	<0.01
Gain	K06141	tsgA; MFS transporter, TsgA protein	284.336	0.39648	<0.01
Gain	K12299	garP; MFS transporter, ACS family, probable galactarate transporter	274.357	0.396482	<0.01
Gain	K16088	TC.FEV.OM1, fhuE, fpvA, fptA; outer-membrane receptor for ferric coprogen and ferric-rhodotorulic acid	302.049	0.396501	<0.01
Gain	K08326	ypdF; aminopeptidase [EC:3.4.11.-]	273.258	0.396518	<0.01
Gain	K13683	wcaE; putative colanic acid biosynthesis glycosyltransferase [EC:2.4.-.-]	272.442	0.396575	<0.01
Gain	K10110	malG; maltose/maltodextrin transport system permease protein	287.766	0.396639	<0.01
Gain	K12291	hofP; pilus assembly protein HofP	274.561	0.396662	<0.01
Gain	K08154	emrD; MFS transporter, DHA1 family, 2-module integral membrane pump EmrD	284.707	0.396702	<0.01
Gain	K19354	waaH; heptose III glucuronosyltransferase [EC:2.4.1.-]	280.186	0.396724	<0.01
Gain	K06858	ABC.VB12.S1, btuF; vitamin B12 transport system substrate-binding protein	294.744	0.396733	<0.01
Gain	K12265	norW; nitric oxide reductase FlRd-NAD(+) reductase [EC:1.18.1.-]	281.035	0.396771	<0.01
Gain	K07224	efeO; iron uptake system component EfeO	292.167	0.396771	<0.01
Gain	K03516	flhE; flagellar protein FlhE	276.273	0.396773	<0.01
Gain	K16695	wzxC; lipopolysaccharide exporter	272.337	0.396783	<0.01
Gain	K06214	csgG; curli production assembly/transport component CsgG	277.241	0.396858	<0.01
Gain	K12974	lpxP; KDO2-lipid IV(A) palmitoleoyltransferase [EC:2.3.1.242]	279.526	0.396966	<0.01
Gain	K07676	rcsD; two-component system, NarL family, sensor histidine kinase RcsD [EC:2.7.13.3]	279.754	0.396986	<0.01
Gain	K11535	nupC; nucleoside transport protein	291.931	0.397002	<0.01
Gain	K07639	rstB; two-component system, OmpR family, sensor histidine kinase RstB [EC:2.7.13.3]	318.927	0.397004	<0.01
Gain	K13069	E2.7.7.65; diguanylate cyclase [EC:2.7.7.65]	296.902	0.397009	<0.01
Gain	K13053	sulA; cell division inhibitor SulA	291.695	0.397028	<0.01
Gain	K02812	PTS-Sor-EIIA, sorF; PTS system, sorbose-specific IIA component [EC:2.7.1.206]	273.947	0.397029	<0.01
Gain	K12147	msyB; acidic protein MsyB	278.599	0.397032	<0.01
Gain	K03445	nepI; MFS transporter, DHA1 family, purine ribonucleoside efflux pump	281.145	0.39711	<0.01
Gain	K07781	rcsA; LuxR family transcriptional regulator, capsular biosynthesis positive transcription factor	276.94	0.397134	<0.01
Gain	K05997	sufA; Fe-S cluster assembly protein SufA	278.633	0.397162	<0.01
Gain	K07678	barA, gacS, varS; two-component system, NarL family, sensor histidine kinase BarA [EC:2.7.13.3]	321.39	0.39719	<0.01
Gain	K02848	waaP, rfaP; heptose I phosphotransferase [EC:2.7.1.-]	285.228	0.397255	<0.01
Gain	K02336	polB; DNA polymerase II [EC:2.7.7.7]	294.464	0.397289	<0.01
Gain	K04338	csgF; curli production assembly/transport component CsgF	276.319	0.397294	<0.01
Gain	K07643	basS; two-component system, OmpR family, sensor histidine kinase BasS [EC:2.7.13.3]	278.589	0.3973	<0.01
Gain	K12961	diaA; DnaA initiator-associating protein	284.804	0.397382	<0.01
Gain	K08354	phsC; thiosulfate reductase cytochrome b subunit	278.139	0.397394	<0.01
Gain	K05522	nei; endonuclease VIII [EC:3.2.2.- 4.2.99.18]	326.186	0.397406	<0.01
Gain	K09896	K09896; uncharacterized protein	289.64	0.397435	<0.01
Gain	K04336	csgC; curli production protein	275.803	0.39747	<0.01
Gain	K15737	csiD; protein CsiD	276.824	0.397503	<0.01
Gain	K15833	hycA; formate hydrogenlyase regulatory protein HycA	278.012	0.397635	<0.01
Gain	K08225	entS; MFS transporter, ENTS family, enterobactin (siderophore) exporter	278.21	0.397662	<0.01
Gain	K13014	arnD; undecaprenyl phosphate-alpha-L-ara4FN deformylase [EC:3.5.1.-]	283.356	0.397669	<0.01
Gain	K03834	tyrP; tyrosine-specific transport protein	295.225	0.39773	<0.01
Gain	K12151	bhsA; multiple stress resistance protein BhsA	281.776	0.397754	<0.01
Gain	K11924	mntR; DtxR family transcriptional regulator, manganese transport regulator	281.219	0.397804	<0.01
Gain	K15536	cybC; soluble cytochrome b562	284.114	0.397807	<0.01
Gain	K05789	wzzB; chain length determinant protein (polysaccharide antigen chain regulator)	279.268	0.397831	<0.01
Gain	K07703	dcuR; two-component system, CitB family, response regulator DcuR	277.436	0.397862	<0.01
Gain	K11929	phoE; outer membrane pore protein E	284.375	0.397881	<0.01
Gain	K07661	rstA; two-component system, OmpR family, response regulator RstA	320.192	0.397882	<0.01
Gain	K12288	hofM; pilus assembly protein HofM	279.754	0.397884	<0.01
Gain	K02562	mtlR; mannitol operon repressor	284.076	0.39789	<0.01
Gain	K11106	ttdT; L-tartrate/succinate antiporter	280.729	0.397895	<0.01
Gain	K18657	zapC; cell division protein ZapC	284.804	0.397896	<0.01
Gain	K07796	cusC, silC; outer membrane protein, Cu(I)/Ag(I) efflux system	277.625	0.398023	<0.01
Gain	K03535	gudP; MFS transporter, ACS family, glucarate transporter	299.557	0.398053	<0.01
Gain	K12112	ebgC; evolved beta-galactosidase subunit beta	275.034	0.39809	<0.01
Gain	K01169	rna; ribonuclease I (enterobacter ribonuclease) [EC:3.1.27.6]	275.069	0.398128	<0.01
Gain	K00932	tdcD; propionate kinase [EC:2.7.2.15]	276.129	0.398137	<0.01
Gain	K04337	csgE; curli production assembly/transport component CsgE	276.195	0.398151	<0.01
Gain	K18446	ygiF; triphosphatase [EC:3.6.1.25]	286.307	0.398202	<0.01
Gain	K18140	envR, acrS; TetR/AcrR family transcriptional regulator, acrEF/envCD operon repressor	274.952	0.39825	<0.01
Gain	K03712	marR; MarR family transcriptional regulator, multiple antibiotic resistance protein MarR	274.952	0.398332	<0.01
Gain	K03290	nanT; MFS transporter, SHS family, sialic acid transporter	276.487	0.398341	<0.01
Gain	K07251	thiK; thiamine kinase [EC:2.7.1.89]	283.579	0.398342	<0.01
Gain	K07136	K07136; uncharacterized protein	298.605	0.398352	<0.01
Gain	K08997	ydiU; uncharacterized protein	310.456	0.398386	<0.01
Gain	K14588	cueO; blue copper oxidase	280.471	0.398388	<0.01
Gain	K02043	phnF; GntR family transcriptional regulator, phosphonate transport system regulatory protein	312.487	0.398395	<0.01
Gain	K02847	waaL, rfaL; O-antigen ligase [EC:2.4.1.-]	291.783	0.398398	<0.01
Gain	K07319	yhdJ; adenine-specific DNA-methyltransferase [EC:2.1.1.72]	272.665	0.398399	<0.01
Gain	K04335	csgB; minor curlin subunit	276.195	0.398407	<0.01
Gain	K13735	yeeJ; adhesin/invasin	1098.9	0.398465	<0.01
Gain	K00313	fixC; electron transfer flavoprotein-quinone oxidoreductase [EC:1.5.5.-]	846.352	0.398477	<0.01
Gain	K01252	entB, dhbB, vibB, mxcF; bifunctional isochorismate lyase / aryl carrier protein [EC:3.3.2.1 6.3.2.14]	283.731	0.398503	<0.01
Gain	K09898	K09898; uncharacterized protein	300.118	0.398512	<0.01
Gain	K09908	K09908; uncharacterized protein	300.118	0.398518	<0.01
Gain	K07637	phoQ; two-component system, OmpR family, sensor histidine kinase PhoQ [EC:2.7.13.3]	298.01	0.398522	<0.01
Gain	K04064	osmE; osmotically inducible lipoprotein OsmE	288.561	0.398562	<0.01
Gain	K03815	xapA; xanthosine phosphorylase [EC:2.4.2.-]	275.733	0.398567	<0.01
Gain	K07772	torR; two-component system, OmpR family, torCAD operon response regulator TorR	274.203	0.398576	<0.01
Gain	K11736	proY; proline-specific permease ProY	278.599	0.398589	<0.01
Gain	K11737	cycA; D-serine/D-alanine/glycine transporter	288.526	0.398605	<0.01
Gain	K09901	K09901; uncharacterized protein	293.156	0.398675	<0.01
Gain	K03805	dsbG; thiol:disulfide interchange protein DsbG	276.069	0.398684	<0.01
Gain	K04022	eutG; alcohol dehydrogenase	276.186	0.398692	<0.01
Gain	K06887	K06887; uncharacterized protein	273.709	0.398713	<0.01
Gain	K12945	nudK; GDP-mannose pyrophosphatase NudK [EC:3.6.1.-]	278.599	0.39872	<0.01
Gain	K02742	sprT; SprT protein	300.19	0.398731	<0.01
Gain	K18324	acrD; multidrug efflux pump	278.599	0.398779	<0.01
Gain	K18142	acrF; multidrug efflux pump	276.212	0.398825	<0.01
Gain	K19709	ydiF; acetate CoA-transferase [EC:2.8.3.8]	272.81	0.398852	<0.01
Gain	K13926	rbbA; ribosome-dependent ATPase	326.199	0.398888	<0.01
Gain	K19000	rof; Rho-binding antiterminator	300.298	0.3989	<0.01
Gain	K09890	arfA; alternative ribosome-rescue factor	300.262	0.398935	<0.01
Gain	K05517	tsx; nucleoside-specific channel-forming protein	554.916	0.398944	<0.01
Gain	K02363	entE, dhbE, vibE, mxcE; 2,3-dihydroxybenzoate-AMP ligase [EC:6.3.2.14 2.7.7.58]	286.617	0.399024	<0.01
Gain	K08277	caiF; transcriptional activator CaiF	273.85	0.399027	<0.01
Gain	K03472	epd; D-erythrose 4-phosphate dehydrogenase [EC:1.2.1.72]	295.082	0.399061	<0.01
Gain	K06447	astD; succinylglutamic semialdehyde dehydrogenase [EC:1.2.1.71]	303.887	0.399061	<0.01
Gain	K06155	gntT; Gnt-I system high-affinity gluconate transporter	287.502	0.39909	<0.01
Gain	K15834	hycH; formate hydrogenlyase maturation protein HycH	294.174	0.3991	<0.01
Gain	K02553	rraA, menG; regulator of ribonuclease activity A	343.634	0.399107	<0.01
Gain	K03112	damX; DamX protein	294.508	0.399138	<0.01
Gain	K07186	smp; membrane protein	289.654	0.399201	<0.01
Gain	K03755	adiY; AraC family transcriptional regulator, transcriptional activator of adiA	275.673	0.399212	<0.01
Gain	K11685	stpA; DNA-binding protein StpA	275.686	0.399231	<0.01
Gain	K08227	lplT; MFS transporter, LPLT family, lysophospholipid transporter	279.754	0.399251	<0.01
Gain	K07229	yqjH; ferric-chelate reductase (NADPH) [EC:1.16.1.9]	275.39	0.399256	<0.01
Gain	K09923	K09923; uncharacterized protein	302.635	0.399261	<0.01
Gain	K09904	K09904; uncharacterized protein	289.654	0.399266	<0.01
Gain	K03477	ulaR; DeoR family transcriptional regulator, ulaG and ulaABCDEF operon transcriptional repressor	288.472	0.399377	<0.01
Gain	K11258	ilvM; acetolactate synthase II small subunit [EC:2.2.1.6]	290.29	0.399402	<0.01
Gain	K07679	evgS, bvgS; two-component system, NarL family, sensor histidine kinase EvgS [EC:2.7.13.3]	283.085	0.39951	<0.01
Gain	K02079	agaA; N-acetylgalactosamine-6-phosphate deacetylase [EC:3.5.1.25]	273.225	0.39953	<0.01
Gain	K13695	nlpC; probable lipoprotein NlpC	297.323	0.399593	<0.01
Gain	K03275	waaO, rfaI; UDP-glucose:(glucosyl)LPS alpha-1,3-glucosyltransferase [EC:2.4.1.-]	278.776	0.399607	<0.01
Gain	K03838	tdcC; threonine transporter	276.129	0.39961	<0.01
Gain	K15545	mlc; transcriptional regulator of PTS gene	286.163	0.399641	<0.01
Gain	K04021	eutE; aldehyde dehydrogenase	276.552	0.399648	<0.01
Gain	K16348	ecnB; entericidin B	279.081	0.399667	<0.01
Gain	K15735	csiR; GntR family transcriptional regulator, carbon starvation induced regulator	276.129	0.39967	<0.01
Gain	K07283	ydiY; putative salt-induced outer membrane protein	288.194	0.399675	<0.01
Gain	K06073	ABC.VB12.P, btuC; vitamin B12 transport system permease protein	284.307	0.399705	<0.01
Gain	K03329	yahN; amino acid exporter	273.85	0.399713	<0.01
Gain	K16347	ecnA; entericidin A	278.741	0.399715	<0.01
Gain	K13301	secM; secretion monitor	280.074	0.399759	<0.01
Gain	K03276	waaR, waaT, rfaJ; UDP-glucose/galactose:(glucosyl)LPS alpha-1,2-glucosyl/galactosyltransferase [EC:2.4.1.-]	280.187	0.399769	<0.01
Gain	K02815	PTS-Sor-EIID, sorM; PTS system, sorbose-specific IID component	282.461	0.39979	<0.01
Gain	K11939	rhtA; inner membrane transporter RhtA	305.603	0.399798	<0.01
Gain	K07237	tusB, dsrH; tRNA 2-thiouridine synthesizing protein B	323.225	0.399819	<0.01
Gain	K08320	nudG; (d)CTP diphosphatase [EC:3.6.1.65]	279.453	0.399839	<0.01
Gain	K07127	uraH, pucM, hiuH; 5-hydroxyisourate hydrolase [EC:3.5.2.17]	365.982	0.399847	<0.01
Gain	K05790	wzzE; lipopolysaccharide biosynthesis protein WzzE	286.023	0.399872	<0.01
Gain	K02850	waaY, rfaY; heptose II phosphotransferase [EC:2.7.1.-]	482.436	0.399885	<0.01
Gain	K11745	kefC; glutathione-regulated potassium-efflux system ancillary protein KefC	281.947	0.399905	<0.01
Gain	K13918	gudX; glucarate dehydratase-related protein	278.761	0.399958	<0.01
Gain	K11107	yfaE; ferredoxin	315.826	0.399962	<0.01
Gain	K03840	fldB; flavodoxin II	285.263	0.399969	<0.01
Gain	K03807	ampE; AmpE protein	292.485	0.399977	<0.01
Gain	K00137	prr; aminobutyraldehyde dehydrogenase [EC:1.2.1.19]	284.997	0.399995	<0.01
Gain	K01194	TREH, treA, treF; alpha,alpha-trehalase [EC:3.2.1.28]	555.999	0.400017	<0.01
Gain	K02538	manR; activator of the mannose operon, transcriptional antiterminator	272.011	0.400022	<0.01
Gain	K00855	PRK, prkB; phosphoribulokinase [EC:2.7.1.19]	309.922	0.400049	<0.01
Gain	K10016	hisQ; histidine transport system permease protein	278.962	0.400078	<0.01
Gain	K05984	cho; excinuclease Cho [EC:3.1.25.-]	278.749	0.400195	<0.01
Gain	K11923	cueR; MerR family transcriptional regulator, copper efflux regulator	281.056	0.400227	<0.01
Gain	K18326	mdtD; MFS transporter, DHA2 family, multidrug resistance protein	278.589	0.400228	<0.01
Gain	K13889	gsiB; glutathione transport system substrate-binding protein	293.591	0.400229	<0.01
Gain	K11066	E3.5.1.28D, amiD; N-acetylmuramoyl-L-alanine amidase [EC:3.5.1.28]	425.467	0.40025	<0.01
Gain	K12500	tesC; thioesterase III [EC:3.1.2.-]	282.111	0.400281	<0.01
Gain	K03674	grxA; glutaredoxin 1	290.012	0.400333	<0.01
Gain	K10000	artP; arginine transport system ATP-binding protein [EC:3.6.3.-]	289.581	0.400336	<0.01
Gain	K19162	tomB; hha toxicity modulator TomB	279.754	0.400357	<0.01
Gain	K05526	astE; succinylglutamate desuccinylase [EC:3.5.1.96]	294.678	0.400357	<0.01
Gain	K01521	cdh; CDP-diacylglycerol pyrophosphatase [EC:3.6.1.26]	280.936	0.400386	<0.01
Gain	K18141	acrE; membrane fusion protein, multidrug efflux system	276.212	0.400396	<0.01
Gain	K11930	torT; periplasmic protein TorT	274.263	0.400407	<0.01
Gain	K13632	marA; AraC family transcriptional regulator, mar-sox-rob regulon activator	275.096	0.400495	<0.01
Gain	K11926	crl; sigma factor-binding protein Crl	284.63	0.400496	<0.01
Gain	K08348	fdnG; formate dehydrogenase-N, alpha subunit [EC:1.17.5.3]	567.347	0.400535	<0.01
Gain	K00098	idnD; L-idonate 5-dehydrogenase [EC:1.1.1.264]	277.04	0.400542	<0.01
Gain	K02100	araE; MFS transporter, SP family, arabinose:H+ symporter	275.78	0.400547	<0.01
Gain	K12264	norV; anaerobic nitric oxide reductase flavorubredoxin	281.604	0.400598	<0.01
Gain	K10538	araH; L-arabinose transport system permease protein	281.708	0.400611	<0.01
Gain	K05775	malM; maltose operon periplasmic protein	284.865	0.400625	<0.01
Gain	K06149	uspA; universal stress protein A	596.385	0.400671	<0.01
Gain	K19226	sapA; cationic peptide transport system substrate-binding protein	289.654	0.400683	<0.01
Gain	K08992	lapA; lipopolysaccharide assembly protein A	313.152	0.400732	<0.01
Gain	K15540	ecpD; chaperone protein EcpD	277.545	0.400741	<0.01
Gain	K09998	artM; arginine transport system permease protein	289.581	0.400754	<0.01
Gain	K03591	ftsN; cell division protein FtsN	288.599	0.40079	<0.01
Gain	K02425	fliZ; regulator of sigma S factor FliZ	277.406	0.400799	<0.01
Gain	K06205	mioC; MioC protein	300.819	0.400851	<0.01
Gain	K03078	ulaD, sgaH, sgbH; 3-dehydro-L-gulonate-6-phosphate decarboxylase [EC:4.1.1.85]	284.152	0.400882	<0.01
Gain	K11932	uspG; universal stress protein G	285.033	0.40089	<0.01
Gain	K07640	cpxA; two-component system, OmpR family, sensor histidine kinase CpxA [EC:2.7.13.3]	338.294	0.4009	<0.01
Gain	K16291	erfK; L,D-transpeptidase ErfK/SrfK	300.504	0.400987	<0.01
Gain	K06211	nadR; HTH-type transcriptional regulator, transcriptional repressor of NAD biosynthesis genes [EC:2.7.7.1 2.7.1.22]	311.317	0.400987	<0.01
Gain	K03788	aphA; acid phosphatase (class B) [EC:3.1.3.2]	288.74	0.400995	<0.01
Gain	K02854	rhaR; AraC family transcriptional regulator, L-rhamnose operon transcriptional activator RhaR	283.872	0.401047	<0.01
Gain	K14762	yibL; ribosome-associated protein	280.824	0.401083	<0.01
Gain	K10015	hisM; histidine transport system permease protein	278.962	0.401088	<0.01
Gain	K12963	arnF; undecaprenyl phosphate-alpha-L-ara4N flippase subunit ArnF	283.356	0.401103	<0.01
Gain	K05839	hha; haemolysin expression modulating protein	282.275	0.401148	<0.01
Gain	K08299	caiD; crotonobetainyl-CoA hydratase [EC:4.2.1.149]	277.919	0.401177	<0.01
Gain	K03528	zipA; cell division protein ZipA	329.266	0.401195	<0.01
Gain	K09999	artQ; arginine transport system permease protein	289.581	0.401255	<0.01
Gain	K17195	alsE; D-allulose-6-phosphate 3-epimerase [EC:5.1.3.-]	285.816	0.401261	<0.01
Gain	K07236	tusC, dsrF; tRNA 2-thiouridine synthesizing protein C	326.331	0.401296	<0.01
Gain	K15549	mdtN; membrane fusion protein, multidrug efflux system	282.055	0.40131	<0.01
Gain	K16703	wcaL, amsK; colanic acid/amylovoran biosynthesis glycosyltransferase [EC:2.4.-.-]	272.73	0.401326	<0.01
Gain	K09712	K09712; uncharacterized protein	280.481	0.40136	<0.01
Gain	K07685	narP; two-component system, NarL family, nitrate/nitrite response regulator NarP	287.698	0.401363	<0.01
Gain	K11735	gabP; GABA permease	279.535	0.401381	<0.01
Gain	K05785	rfaH; transcriptional antiterminator RfaH	289.303	0.401385	<0.01
Gain	K16693	wzxE; enterobacterial common antigen flippase	280.074	0.401388	<0.01
Gain	K12148	bssS; biofilm regulator BssS	279.754	0.401416	<0.01
Gain	K13892	gsiA; glutathione transport system ATP-binding protein	281.198	0.401419	<0.01
Gain	K05368	fre, ubiB; aquacobalamin reductase / NAD(P)H-flavin reductase [EC:1.16.1.3 1.5.1.41]	284.792	0.401421	<0.01
Gain	K07348	fimF; minor fimbrial subunit	277.203	0.401421	<0.01
Gain	K19236	ycfS; L,D-transpeptidase YcfS	285.336	0.401422	<0.01
Gain	K08324	sad; succinate-semialdehyde dehydrogenase [EC:1.2.1.16 1.2.1.24]	277.399	0.40147	<0.01
Gain	K00892	gsk; inosine kinase [EC:2.7.1.73]	286.61	0.401484	<0.01
Gain	K14051	gmr; c-di-GMP phosphodiesterase Gmr [EC:3.1.4.52]	274.758	0.401494	<0.01
Gain	K01460	gsp; glutathionylspermidine amidase/synthetase [EC:3.5.1.78 6.3.1.8]	277.342	0.401495	<0.01
Gain	K16263	yjeH; amino acid efflux transporter	282.919	0.401503	<0.01
Gain	K11751	ushA; 5'-nucleotidase / UDP-sugar diphosphatase [EC:3.1.3.5 3.6.1.45]	286.96	0.401567	<0.01
Gain	K04775	ydgD; protease YdgD [EC:3.4.21.-]	287.55	0.40157	<0.01
Gain	K11925	sgrR; SgrR family transcriptional regulator	284.825	0.401578	<0.01
Gain	K06006	cpxP; periplasmic protein CpxP	281.935	0.401635	<0.01
Gain	K03468	aaeB; p-hydroxybenzoic acid efflux pump subunit AaeB	278.599	0.401669	<0.01
Gain	K12507	fadK; acyl-CoA synthetase [EC:6.2.1.-]	305.715	0.40168	<0.01
Gain	K00427	lldP, lctP; L-lactate permease	276.56	0.401705	<0.01
Gain	K07470	sbmC; DNA gyrase inhibitor	278.284	0.401716	<0.01
Gain	K09910	K09910; uncharacterized protein	289.654	0.401747	<0.01
Gain	K06866	grcA; autonomous glycyl radical cofactor	289.97	0.401787	<0.01
Gain	K08485	PTS-HPR.PTSO, ptsO, npr; phosphocarrier protein NPr	285.107	0.401788	<0.01
Gain	K03603	fadR; GntR family transcriptional regulator, negative regulator for fad regulon and positive regulator of fabA	289.654	0.401815	<0.01
Gain	K02681	ppdC; prepilin peptidase dependent protein C	284.774	0.401852	<0.01
Gain	K09968	K09968; uncharacterized protein	317.578	0.401882	<0.01
Gain	K15723	syd; SecY interacting protein Syd	284.719	0.401957	<0.01
Gain	K04020	eutD; phosphotransacetylase	276.186	0.401991	<0.01
Gain	K04067	priC; primosomal replication protein N''	286.233	0.401992	<0.01
Gain	K14061	uspF; universal stress protein F	286.224	0.402113	<0.01
Gain	K08993	yhhL; putative membrane protein	304.81	0.402128	<0.01
Gain	K15548	aaeA; p-hydroxybenzoic acid efflux pump subunit AaeA	278.599	0.402159	<0.01
Gain	K03670	mdoG; periplasmic glucans biosynthesis protein	325.043	0.402162	<0.01
Gain	K09912	K09912; uncharacterized protein	318.532	0.402173	<0.01
Gain	K03971	pspD; phage shock protein D	278.599	0.402217	<0.01
Gain	K12973	pagP, crcA; lipid IVA palmitoyltransferase [EC:2.3.1.251]	278.913	0.40223	<0.01
Gain	K07235	tusD, dsrE; tRNA 2-thiouridine synthesizing protein D [EC:2.8.1.-]	326.49	0.402242	<0.01
Gain	K07269	ytfB; uncharacterized protein	285.575	0.402243	<0.01
Gain	K00885	nanK; N-acylmannosamine kinase [EC:2.7.1.60]	280.909	0.402244	<0.01
Gain	K07810	cusF; Cu(I)/Ag(I) efflux system periplasmic protein CusF	281.112	0.402247	<0.01
Gain	K08350	fdnI; formate dehydrogenase-N, gamma subunit	283.731	0.402252	<0.01
Gain	K13629	dsdX; D-serine transporter	278.901	0.402291	<0.01
Gain	K02467	gutQ; arabinose 5-phosphate isomerase [EC:5.3.1.13]	274.963	0.4023	<0.01
Gain	K10038	glnQ; glutamine transport system ATP-binding protein [EC:3.6.3.-]	278.93	0.402341	<0.01
Gain	K11391	rlmG; 23S rRNA (guanine1835-N2)-methyltransferase [EC:2.1.1.174]	279.048	0.402357	<0.01
Gain	K02468	srlR, gutR; DeoR family transcriptional regulator, glucitol operon repressor	278.683	0.402372	<0.01
Gain	K16704	rffC, wecD; dTDP-4-amino-4,6-dideoxy-D-galactose acyltransferase [EC:2.3.1.210]	280.137	0.402372	<0.01
Gain	K16301	efeB; deferrochelatase/peroxidase EfeB [EC:1.11.1.-]	292.829	0.402483	<0.01
Gain	K07347	fimD, fimC, mrkC, htrE, cssD; outer membrane usher protein	1741.36	0.402488	<0.01
Gain	K03974	pspF; psp operon transcriptional activator	293.618	0.402531	<0.01
Gain	K09161	K09161; uncharacterized protein	286.236	0.402556	<0.01
Gain	K13638	zntR; MerR family transcriptional regulator, Zn(II)-responsive regulator of zntA	285.09	0.40271	<0.01
Gain	K00840	astC; succinylornithine aminotransferase [EC:2.6.1.81]	279.691	0.402731	<0.01
Gain	K02853	wzyE, rffT; enterobacterial common antigen polymerase [EC:2.4.1.-]	280.137	0.402761	<0.01
Gain	K18765	csrD; RNase E specificity factor CsrD	283.564	0.402793	<0.01
Gain	K01825	fadB; 3-hydroxyacyl-CoA dehydrogenase / enoyl-CoA hydratase / 3-hydroxybutyryl-CoA epimerase / enoyl-CoA isomerase [EC:1.1.1.35 4.2.1.17 5.1.2.3 5.3.3.8]	321.794	0.402806	<0.01
Gain	K07686	uhpA; two-component system, NarL family, uhpT operon response regulator UhpA	288.35	0.40288	<0.01
Gain	K07806	arnB, pmrH; UDP-4-amino-4-deoxy-L-arabinose-oxoglutarate aminotransferase [EC:2.6.1.87]	283.356	0.402897	<0.01
Gain	K07702	dpiA, citB; two-component system, CitB family, response regulator CitB	281.215	0.402909	<0.01
Gain	K02344	holD; DNA polymerase III subunit psi [EC:2.7.7.7]	290.05	0.40296	<0.01
Gain	K03632	mukB; chromosome partition protein MukB	289.581	0.403005	<0.01
Gain	K18697	pgpC; phosphatidylglycerophosphatase C [EC:3.1.3.27]	286.201	0.403085	<0.01
Gain	K05796	hydN; electron transport protein HydN	302.69	0.403097	<0.01
Gain	K18890	mdlB, smdB; ATP-binding cassette, subfamily B, multidrug efflux pump	283.579	0.403098	<0.01
Gain	K03824	yhbS; putative acetyltransferase [EC:2.3.1.-]	400.134	0.4031	<0.01
Gain	K07711	glrK, qseE; two-component system, NtrC family, sensor histidine kinase GlrK [EC:2.7.13.3]	285.659	0.403102	<0.01
Gain	K12525	metL; bifunctional aspartokinase / homoserine dehydrogenase 2 [EC:2.7.2.4 1.1.1.3]	284.719	0.403193	<0.01
Gain	K08682	acpH; acyl carrier protein phosphodiesterase [EC:3.1.4.14]	280.108	0.403204	<0.01
Gain	K04013	nrfB; cytochrome c-type protein NrfB	281.477	0.403214	<0.01
Gain	K08160	mdfA, cmr; MFS transporter, DHA1 family, multidrug/chloramphenicol efflux transport protein	284.095	0.403257	<0.01
Gain	K09894	K09894; uncharacterized protein	289.739	0.403267	<0.01
Gain	K03291	MFS.SET; MFS transporter, SET family, sugar efflux transporter	295.632	0.403293	<0.01
Gain	K11938	cof; HMP-PP phosphatase [EC:3.6.1.-]	278.345	0.403326	<0.01
Gain	K07245	pcoD; copper resistance protein D	307.309	0.403338	<0.01
Gain	K09920	K09920; uncharacterized protein	302.165	0.403343	<0.01
Gain	K07700	dpiB, citA; two-component system, CitB family, cit operon sensor histidine kinase CitA [EC:2.7.13.3]	281.215	0.403359	<0.01
Gain	K09917	K09917; uncharacterized protein	285.991	0.403368	<0.01
Gain	K03804	mukE; chromosome partition protein MukE	289.581	0.403383	<0.01
Gain	K03208	wcaI; colanic acid biosynthesis glycosyl transferase WcaI	273.116	0.40346	<0.01
Gain	K06144	uspB; universal stress protein B	281.056	0.403505	<0.01
Gain	K07701	dcuS; two-component system, CitB family, sensor histidine kinase DcuS [EC:2.7.13.3]	277.34	0.403512	<0.01
Gain	K07346	fimC; fimbrial chaperone protein	576.679	0.403547	<0.01
Gain	K07689	uvrY, gacA, varA; two-component system, NarL family, invasion response regulator UvrY	286.357	0.403566	<0.01
Gain	K08723	yjjG; 5'-nucleotidase [EC:3.1.3.5]	275.8	0.403691	<0.01
Gain	K18889	mdlA, smdA; ATP-binding cassette, subfamily B, multidrug efflux pump	288.95	0.403703	<0.01
Gain	K01407	ptrA; protease III [EC:3.4.24.55]	281.535	0.40372	<0.01
Gain	K07285	slp; outer membrane lipoprotein	565.924	0.403732	<0.01
Gain	K10748	tus, tau; DNA replication terminus site-binding protein	283.259	0.403755	<0.01
Gain	K06080	rcsF; RcsF protein	284.449	0.403769	<0.01
Gain	K07664	baeR, smeR; two-component system, OmpR family, response regulator BaeR	281.368	0.403833	<0.01
Gain	K11933	hcr; NADH oxidoreductase Hcr [EC:1.-.-.-]	284.128	0.403842	<0.01
Gain	K19778	hdeB; acid stress chaperone HdeB	284.914	0.40391	<0.01
Gain	K08349	fdnH; formate dehydrogenase-N, beta subunit	282.822	0.403911	<0.01
Gain	K15736	lhgO; L-2-hydroxyglutarate oxidase [EC:1.1.3.-]	282.016	0.403966	<0.01
Gain	K03762	proP; MFS transporter, MHS family, proline/betaine transporter	363.94	0.403974	<0.01
Gain	K08137	galP; MFS transporter, SP family, galactose:H+ symporter	282.009	0.403981	<0.01
Gain	K12582	wecF, rffT; dTDP-N-acetylfucosamine:lipid II N-acetylfucosaminyltransferase [EC:2.4.1.325]	280.137	0.403994	<0.01
Gain	K03970	pspB; phage shock protein B	293.525	0.404006	<0.01
Gain	K07690	evgA, bvgA; two-component system, NarL family, response regulator EvgA	280.522	0.404026	<0.01
Gain	K03503	umuD; DNA polymerase V [EC:3.4.21.-]	1090.53	0.404034	<0.01
Gain	K09906	epmC; elongation factor P hydroxylase [EC:1.14.-.-]	312.348	0.404056	<0.01
Gain	K02504	hofB; protein transport protein HofB	284.774	0.404068	<0.01
Gain	K03435	fruR1, fruR; LacI family transcriptional regulator, fructose operon transcriptional repressor	306.717	0.404125	<0.01
Gain	K07490	feoC; ferrous iron transport protein C	279.403	0.404155	<0.01
Gain	K14062	ompN; outer membrane protein N	283.965	0.404157	<0.01
Gain	K14064	uspC; universal stress protein C	278.012	0.404204	<0.01
Gain	K03764	metJ; MetJ family transcriptional regulator, methionine regulon repressor	289.739	0.404256	<0.01
Gain	K19688	bssR; biofilm regulator BssR	274.952	0.404267	<0.01
Gain	K06884	K06884; uncharacterized protein	294.057	0.404292	<0.01
Gain	K05811	yfiM; putative lipoprotein	278.355	0.404312	<0.01
Gain	K10014	hisJ; histidine transport system substrate-binding protein	281.417	0.404312	<0.01
Gain	K02679	ppdA; prepilin peptidase dependent protein A	284.774	0.404343	<0.01
Gain	K09994	phnO; aminoalkylphosphonate N-acetyltransferase [EC:2.3.1.-]	298.475	0.404438	<0.01
Gain	K03533	torD; TorA specific chaperone	331.925	0.404446	<0.01
Gain	K07782	sdiA; LuxR family transcriptional regulator, quorum-sensing system regulator SdiA	282.928	0.404527	<0.01
Gain	K13631	soxS; AraC family transcriptional regulator, mar-sox-rob regulon activator	277.959	0.404541	<0.01
Gain	K01175	ybfF; esterase [EC:3.1.-.-]	290.012	0.404581	<0.01
Gain	K09997	artI; arginine transport system substrate-binding protein	291.835	0.40476	<0.01
Gain	K02505	hofC; protein transport protein HofC	284.774	0.404763	<0.01
Gain	K09907	K09907; uncharacterized protein	289.654	0.404772	<0.01
Gain	K03425	tatE; sec-independent protein translocase protein TatE	278.599	0.404809	<0.01
Gain	K09996	artJ; arginine transport system substrate-binding protein	281.934	0.404902	<0.01
Gain	K07156	copC, pcoC; copper resistance protein C	302.457	0.40495	<0.01
Gain	K02466	gutM; glucitol operon activator protein	275.002	0.405107	<0.01
Gain	K01146	xni; protein Xni	284.719	0.405162	<0.01
Gain	K02565	nagC; N-acetylglucosamine repressor	390.767	0.405229	<0.01
Gain	K08970	rcnA; nickel/cobalt exporter	281.56	0.405267	<0.01
Gain	K05881	dhaM; phosphoenolpyruvate---glycerone phosphotransferase subunit DhaM [EC:2.7.1.121]	283.198	0.405274	<0.01
Gain	K13891	gsiD; glutathione transport system permease protein	294.239	0.405334	<0.01
Gain	K03645	seqA; negative modulator of initiation of replication	289.739	0.405343	<0.01
Gain	K03212	rumB; 23S rRNA (uracil747-C5)-methyltransferase [EC:2.1.1.189]	289.028	0.405394	<0.01
Gain	K01782	fadJ; 3-hydroxyacyl-CoA dehydrogenase / enoyl-CoA hydratase / 3-hydroxybutyryl-CoA epimerase [EC:1.1.1.35 4.2.1.17 5.1.2.3]	353.116	0.405428	<0.01
Gain	K13630	marB; multiple antibiotic resistance protein MarB	274.952	0.405522	<0.01
Gain	K07351	fimI; fimbrial protein	282.186	0.405604	<0.01
Gain	K04033	eutR; AraC family transcriptional regulator, ethanolamine operon transcriptional activator	279.741	0.405674	<0.01
Gain	K09900	K09900; uncharacterized protein	286.534	0.405756	<0.01
Gain	K02839	prfH; peptide chain release factor	325.617	0.405781	<0.01
Gain	K06145	gntR; LacI family transcriptional regulator, gluconate utilization system Gnt-I transcriptional repressor	329.409	0.405856	<0.01
Gain	K09476	ompF; outer membrane pore protein F	281.9	0.406058	<0.01
Gain	K18478	yihV; sulfofructose kinase [EC:2.7.1.184]	296.042	0.406082	<0.01
Gain	K07757	ybiV; sugar-phosphatase [EC:3.1.3.23]	300.161	0.406203	<0.01
Gain	K07674	narQ; two-component system, NarL family, nitrate/nitrite sensor histidine kinase NarQ [EC:2.7.13.3]	285.943	0.406393	<0.01
Gain	K15974	emrR, mprA; MarR family transcriptional regulator, negative regulator of the multidrug operon emrRAB	281.961	0.406434	<0.01
Gain	K00884	NAGK, nagK; N-acetylglucosamine kinase [EC:2.7.1.59]	301.329	0.406455	<0.01
Gain	K13255	fhuF; ferric iron reductase protein FhuF	283.54	0.406641	<0.01
Gain	K13637	uxuR; GntR family transcriptional regulator, uxu operon transcriptional repressor	289.549	0.406683	<0.01
Gain	K09914	K09914; putative lipoprotein	284.734	0.406726	<0.01
Gain	K02485	rssB, hnr; two-component system, response regulator	282.17	0.406767	<0.01
Gain	K11940	hspQ; heat shock protein HspQ	313.983	0.40684	<0.01
Gain	K19775	exuR; GntR family transcriptional regulator, hexuronate regulon transcriptional repressor	277.7	0.406846	<0.01
Gain	K07675	uhpB; two-component system, NarL family, sensor histidine kinase UhpB [EC:2.7.13.3]	311.572	0.406861	<0.01
Gain	K00216	entA; 2,3-dihydro-2,3-dihydroxybenzoate dehydrogenase [EC:1.3.1.28]	282.469	0.40713	<0.01
Gain	K14977	ylbA, UGHY; (S)-ureidoglycine aminohydrolase [EC:3.5.3.26]	302.37	0.407133	<0.01
Gain	K01096	pgpB; phosphatidylglycerophosphatase B [EC:3.1.3.27 3.1.3.81 3.1.3.4 3.6.1.27]	289.349	0.407286	<0.01
Gain	K15827	hycB; formate hydrogenlyase subunit 2	278.012	0.407296	<0.01
Gain	K09802	K09802; uncharacterized protein	395.976	0.407378	<0.01
Gain	K19303	mepH; murein DD-endopeptidase [EC:3.4.-.-]	279.017	0.407542	<0.01
Gain	K11738	ansP; L-asparagine permease	285.031	0.407571	<0.01
Gain	K19611	fepA, pfeA, iroN, pirA; ferric enterobactin receptor	284.223	0.407761	<0.01
Gain	K11941	mdoC; glucans biosynthesis protein C [EC:2.1.-.-]	279.382	0.407965	<0.01
Gain	K07771	basR; two-component system, OmpR family, response regulator BasR	280.03	0.408021	<0.01
Gain	K02345	holE; DNA polymerase III subunit theta [EC:2.7.7.7]	286.622	0.408047	<0.01
Gain	K15832	hycG; formate hydrogenlyase subunit 7	285.032	0.408214	<0.01
Gain	K03777	dld; D-lactate dehydrogenase (quinone) [EC:1.1.5.12]	293.388	0.40829	<0.01
Gain	K07345	fimA; major type 1 subunit fimbrin (pilin)	595.372	0.408316	<0.01
Gain	K02430	fucR; DeoR family transcriptional regulator, L-fucose operon activator	283.17	0.408343	<0.01
Gain	K12975	eptB; KDO II ethanolaminephosphotransferase [EC:2.7.8.42]	279.76	0.408349	<0.01
Gain	K03649	mug; double-stranded uracil-DNA glycosylase [EC:3.2.2.28]	296.031	0.40835	<0.01
Gain	K00073	allD; ureidoglycolate dehydrogenase (NAD+) [EC:1.1.1.350]	320.996	0.408506	<0.01
Gain	K07274	mipA, ompV; MipA family protein	425.414	0.408513	<0.01
Gain	K03633	mukF; chromosome partition protein MukF	289.581	0.408757	<0.01
Gain	K18988	ampH; serine-type D-Ala-D-Ala carboxypeptidase/endopeptidase [EC:3.4.16.4 3.4.21.-]	280.803	0.408897	<0.01
Gain	K03184	ubiF; 2-octaprenyl-3-methyl-6-methoxy-1,4-benzoquinol hydroxylase [EC:1.14.13.-]	292.678	0.408987	<0.01
Gain	K12957	yjgB; uncharacterized zinc-type alcohol dehydrogenase-like protein [EC:1.-.-.-]	288.782	0.409154	<0.01
Gain	K00880	lyxK; L-xylulokinase [EC:2.7.1.53]	292.359	0.409877	<0.01
Gain	K09911	K09911; uncharacterized protein	286.076	0.409879	<0.01
Gain	K09895	K09895; uncharacterized protein	334.352	0.410205	<0.01
Gain	K10013	ABC.ARG.S, argT; lysine/arginine/ornithine transport system substrate-binding protein	280.422	0.410271	<0.01
Gain	K19270	yfbT, yniC; sugar-phosphatase [EC:3.1.3.23]	590.673	0.410967	<0.01
Gain	K18800	ubiI; 2-octaprenylphenol hydroxylase [EC:1.14.13.-]	306.2	0.411102	<0.01
Gain	K05809	raiA; ribosome-associated inhibitor A	289.739	0.41136	<0.01
Gain	K07184	ygiM; SH3 domain protein	303.26	0.411423	<0.01
Gain	K15830	hycE; formate hydrogenlyase subunit 5	289.52	0.411574	<0.01
Gain	K01002	mdoB; phosphoglycerol transferase [EC:2.7.8.20]	556.23	0.411704	<0.01
Gain	K07724	ner, nlp, sfsB; Ner family transcriptional regulator	295.822	0.412121	<0.01
Gain	K07070	K07070; uncharacterized protein	323.142	0.412328	<0.01
Gain	K07715	glrR, qseF; two-component system, NtrC family, response regulator GlrR	285.501	0.41242	<0.01
Gain	K06074	ABC.VB12.A, btuD; vitamin B12 transport system ATP-binding protein [EC:3.6.3.33]	284.307	0.412708	<0.01
Gain	K07733	alpA; prophage regulatory protein	317.281	0.412718	<0.01
Gain	K08990	ycjF; putative membrane protein	302.01	0.412942	<0.01
Gain	K02472	wecC; UDP-N-acetyl-D-mannosaminuronic acid dehydrogenase [EC:1.1.1.336]	720.55	0.413815	<0.01
Gain	K05804	rob; AraC family transcriptional regulator, mar-sox-rob regulon activator	300.46	0.41383	<0.01
Gain	K19222	menI; 1,4-dihydroxy-2-naphthoyl-CoA hydrolase [EC:3.1.2.28]	312.939	0.414364	<0.01
Gain	K07454	K07454; putative restriction endonuclease	318.733	0.419911	<0.01
Gain	K00881	alsK; allose kinase [EC:2.7.1.55]	312.669	0.423998	<0.01
Gain	K02478	K02478; two-component system, LytTR family, sensor kinase [EC:2.7.13.3]	1003.1	0.425278	<0.01
Gain	K11249	eamB; cysteine/O-acetylserine efflux protein	304.063	0.425772	<0.01
Gain	K02855	rhaS; AraC family transcriptional regulator, L-rhamnose operon regulatory protein RhaS	314.544	0.429723	<0.01
Gain	K00675	nhoA; N-hydroxyarylamine O-acetyltransferase [EC:2.3.1.118]	366.241	0.432844	<0.01
Gain	K08322	rspB; L-gulonate 5-dehydrogenase [EC:1.1.1.380]	349.253	0.437828	<0.01
Gain	K02526	kdgT; 2-keto-3-deoxygluconate permease	336.935	0.44172	<0.01
Gain	K14591	aroM; protein AroM	321.333	0.445186	<0.01

## Sheet: C. MetaCyc_sig._pathways
Table S5-C. MetaCyc pathways related to pig body weight
test-group	path-id	MetaCyc_pathways	Spearman		Av. counts
			R	p
Gain	path261	peptidoglycan biosynthesis V (&beta;-lactam resistance)	-0.342647	<0.01	1846.79
Gain	path218	palmitate biosynthesis II (bacteria and plants)	-0.225441	<0.01	13584.1
Gain	path375	tRNA processing	0.211783	<0.01	2835.53
Gain	path204	ubiquinol-10 biosynthesis (prokaryotic)	0.222077	<0.01	1075.8
Gain	path284	ubiquinol-8 biosynthesis (prokaryotic)	0.223076	<0.01	1075.8
Gain	path404	superpathway of glyoxylate bypass and TCA	0.22329	<0.01	1392.52
Gain	path202	ubiquinol-7 biosynthesis (prokaryotic)	0.224086	<0.01	1075.8
Gain	path57	superpathway of glycolysis, pyruvate dehydrogenase, TCA, and glyoxylate bypass	0.224571	<0.01	2407.91
Gain	path203	ubiquinol-9 biosynthesis (prokaryotic)	0.224775	<0.01	1075.8
Gain	path412	superpathway of ubiquinol-8 biosynthesis (prokaryotic)	0.22572	<0.01	1049.29
Gain	path89	TCA cycle IV (2-oxoglutarate decarboxylase)	0.239941	<0.01	3488.22
Gain	path397	formaldehyde oxidation I	0.243843	<0.01	1905.82
Gain	path120	ppGpp biosynthesis	0.243854	<0.01	1439.72
Gain	path130	formaldehyde assimilation II (RuMP Cycle)	0.247588	<0.01	3137.68
Gain	path58	glyoxylate cycle	0.257948	<0.01	1498.89
Gain	path198	superpathway of menaquinol-8 biosynthesis I	0.260914	<0.01	2676.46
Gain	path212	superpathway of menaquinol-13 biosynthesis	0.261206	<0.01	2440.22
Gain	path199	superpathway of menaquinol-7 biosynthesis	0.261467	<0.01	2701.2
Gain	path210	superpathway of menaquinol-11 biosynthesis	0.261853	<0.01	2440.22
Gain	path206	superpathway of demethylmenaquinol-8 biosynthesis	0.262348	<0.01	1973.47
Gain	path211	superpathway of menaquinol-12 biosynthesis	0.262389	<0.01	2440.22
Gain	path197	1,4-dihydroxy-2-naphthoate biosynthesis I	0.263552	<0.01	1040.58
Gain	path208	superpathway of phylloquinol biosynthesis	0.26709	<0.01	1179.86
Gain	path69	superpathway of (Kdo)2-lipid A biosynthesis	0.274827	<0.01	2225.77
Gain	path80	NAD salvage pathway II	0.280043	<0.01	1391.82
Gain	path39	fucose degradation	0.281191	<0.01	2111.63
Gain	path277	superpathway of L-tryptophan biosynthesis	0.285913	<0.01	2818.39
Gain	path32	enterobactin biosynthesis	0.290522	<0.01	1292.12
Gain	path38	superpathway of fucose and rhamnose degradation	0.296587	<0.01	2642.62
Gain	path201	superpathway of menaquinol-6 biosynthesis I	0.298791	<0.01	1682.03
Gain	path3	superpathway of chorismate metabolism	0.29895	<0.01	1535.04
Gain	path205	superpathway of demethylmenaquinol-6 biosynthesis I	0.298979	<0.01	1228
Gain	path200	superpathway of menaquinol-9 biosynthesis	0.299413	<0.01	1682.03
Gain	path207	superpathway of demethylmenaquinol-9 biosynthesis	0.299584	<0.01	1228
Gain	path209	superpathway of menaquinol-10 biosynthesis	0.301944	<0.01	1682.03
Lose	path158	tetrapyrrole biosynthesis I (from glutamate)	-0.344653	<0.01	26828.7
Lose	path159	tetrapyrrole biosynthesis II (from glycine)	-0.325985	<0.01	24966.5
Lose	path93	superpathway of (R,R)-butanediol biosynthesis	-0.305441	0.03	10758.2
Lose	path293	thiazole biosynthesis I (E. coli)	-0.302345	0.02	32546.9
Lose	path413	UDP-N-acetyl-D-glucosamine biosynthesis I	-0.299062	<0.01	31988.8
Lose	path371	superpathway of pyrimidine deoxyribonucleosides degradation	-0.298593	<0.01	28564.1
Lose	path94	acetylene degradation	-0.297561	0.01	35633.4
Lose	path313	pyruvate fermentation to isobutanol (engineered)	-0.292402	0.02	52088.6
Lose	path15	superpathway of branched amino acid biosynthesis	-0.292026	0.04	47933.6
Lose	path415	L-valine biosynthesis	-0.290619	0.03	48762.7
Lose	path149	L-isoleucine biosynthesis IV	-0.290525	0.03	50632.3
Lose	path148	L-isoleucine biosynthesis III	-0.285178	0.03	45935.9
Lose	path65	L-histidine biosynthesis	-0.282552	0.01	36194.2
Lose	path388	phosphatidylglycerol biosynthesis I (plastidic)	-0.281707	0.02	41017.9
Lose	path147	L-isoleucine biosynthesis II	-0.281332	0.02	52657.2
Lose	path399	superpathway of L-serine and glycine biosynthesis I	-0.280863	0.01	43825.5
Lose	path68	L-isoleucine biosynthesis I (from threonine)	-0.279831	0.04	48762.7
Lose	path392	NAD biosynthesis I (from aspartate)	-0.277674	0.04	36385.1
Lose	path333	myo-, chiro- and scillo-inositol degradation	-0.276735	<0.01	10069.7
Lose	path370	superpathway of purine deoxyribonucleosides degradation	-0.276454	0.01	27733.3
Lose	path389	phosphatidylglycerol biosynthesis II (non-plastidic)	-0.274765	0.04	41017.9
Lose	path26	L-lysine biosynthesis I	-0.270169	0.04	38992.4
Lose	path20	coenzyme A biosynthesis I	-0.267448	0.02	42383.1
Lose	path85	O-antigen building blocks biosynthesis (E. coli)	-0.26576	0.04	33882.4
Lose	path116	superpathway of phospholipid biosynthesis I (bacteria)	-0.265478	0.03	43884.1
Lose	path369	purine ribonucleosides degradation	-0.265478	0.01	27738.8
Lose	path9	L-arginine biosynthesis I (via L-ornithine)	-0.265197	0.04	34309.6
Lose	path322	superpathway of pyrimidine nucleobases salvage	-0.264822	0.02	51717
Lose	path328	guanosine ribonucleotides de novo biosynthesis	-0.260788	0.02	43820.6
Lose	path325	adenosine ribonucleotides de novo biosynthesis	-0.257036	0.04	50872.5
Lose	path145	L-lysine biosynthesis VI	-0.256379	0.04	46100.7
Lose	path21	adenosylcobalamin salvage from cobinamide I	-0.255629	0.03	37187.6
Lose	path150	superpathway of geranylgeranyl diphosphate biosynthesis II (via MEP)	-0.254409	0.04	41589.8
Lose	path361	gondoate biosynthesis (anaerobic)	-0.249719	0.03	53214.3
Lose	path186	CDP-diacylglycerol biosynthesis I	-0.249437	0.02	48642.8
Lose	path245	superpathway of 5-aminoimidazole ribonucleotide biosynthesis	-0.248405	0.04	46340.7
Lose	path227	superpathway of adenosine nucleotides de novo biosynthesis II	-0.246717	0.04	49182.2
Lose	path358	methylerythritol phosphate pathway II	-0.246435	0.02	42504.5
Lose	path176	adenosylcobalamin biosynthesis from cobyrinate a,c-diamide I	-0.246154	0.04	35103.7
Lose	path223	5-aminoimidazole ribonucleotide biosynthesis I	-0.243527	0.04	46876.5
Lose	path408	superpathway of L-threonine biosynthesis	-0.233959	0.04	46698.1
Lose	path218	palmitate biosynthesis II (bacteria and plants)	0.220732	0.04	8907.2
Lose	path375	tRNA processing	0.225328	0.03	8697.68
Lose	path58	glyoxylate cycle	0.226454	0.04	7436.07
Lose	path207	superpathway of demethylmenaquinol-9 biosynthesis	0.227205	0.01	6342.57
Lose	path276	superpathway of L-phenylalanine biosynthesis	0.229362	0.04	15109
Lose	path3	superpathway of chorismate metabolism	0.233114	0.03	7655.96
Lose	path100	reductive TCA cycle I	0.235178	0.03	13294.2
Lose	path212	superpathway of menaquinol-13 biosynthesis	0.235835	0.03	9584.38
Lose	path201	superpathway of menaquinol-6 biosynthesis I	0.235929	0.02	7868.1
Lose	path382	2-methylcitrate cycle I	0.236023	0.02	2695.37
Lose	path47	superpathway of D-glucarate and D-galactarate degradation	0.236867	0.03	3354.15
Lose	path41	D-galactarate degradation I	0.237336	0.03	3354.15
Lose	path381	allantoin degradation IV (anaerobic)	0.241557	0.04	2929.06
Lose	path211	superpathway of menaquinol-12 biosynthesis	0.241745	0.03	9584.38
Lose	path54	superpathway of glycol metabolism and degradation	0.24409	0.03	4307.28
Lose	path390	mycolate biosynthesis	0.244747	0.04	11485.3
Lose	path70	ketogluconate metabolism	0.244747	0.03	3659.37
Lose	path62	heme biosynthesis II (anaerobic)	0.24531	0.04	10448.3
Lose	path275	superpathway of tetrahydrofolate biosynthesis	0.246341	0.03	30541.3
Lose	path78	superpathway of methylglyoxal degradation	0.248218	0.03	3383.84
Lose	path89	TCA cycle IV (2-oxoglutarate decarboxylase)	0.249156	0.03	12706.5
Lose	path335	TCA cycle VII (acetate-producers)	0.249906	0.04	7016.1
Lose	path404	superpathway of glyoxylate bypass and TCA	0.250188	0.03	7505.7
Lose	path57	superpathway of glycolysis, pyruvate dehydrogenase, TCA, and glyoxylate bypass	0.253471	0.04	10916.6
Lose	path366	ADP-L-glycero-&beta;-D-manno-heptose biosynthesis	0.255066	0.04	4869.93
Lose	path74	superpathway of lipopolysaccharide biosynthesis	0.264071	0.01	5563.9
Lose	path69	superpathway of (Kdo)2-lipid A biosynthesis	0.269043	0.01	8075.43
Lose	path266	8-amino-7-oxononanoate biosynthesis I	0.278424	0.04	11972.5
Lose	path63	superpathway of hexitol degradation (bacteria)	0.292402	0.02	10255.1
Lose	path384	superpathway of pyridoxal 5'-phosphate biosynthesis and salvage	0.296341	0.02	16920.1
Lose	path294	superpathway of thiamin diphosphate biosynthesis II	0.36182	0.01	19294.7
